# Supplementary material for: Preparation of Half- and Post-Metallocene Hafnium Complexes with Tetrahydroquinoline and Tetrahydrophenanthroline Frameworks for Olefin Polymerization
Source: MDPI journal article supplement (doi:10.3390/polym11071093), 2019-06-27

# Supporting Information

## Preparation of Half- and Post-metallocene Hafnium Complexes with Tetrahydroquinoline and Tetrahydrophenanthroline Frameworks for Olefin Polymerization

Jun Won Baek,<sup>1</sup> Su Jin Kwon,<sup>1</sup> Hyun Ju Lee,<sup>1</sup> Tae Jin Kim,<sup>1</sup> Ji Yeon Ryu,<sup>b</sup> Junseong Lee,<sup>2</sup> Eun Ji Shin,<sup>3</sup> Ki Soo Lee,<sup>3</sup> and Bun Yeoul Lee<sup>1,\*</sup>

<sup>1</sup>Department of Molecular Science and Technology, Ajou University, Suwon 16499, South Korea; btw91@ajou.ac.kr (J.W.B.); ksj9355@ajou.ac.kr (S.J.K.); hjulee4639@ajou.ac.kr (H.J.L.); playing3457@ajou.ac.kr (T.J.K.)

<sup>2</sup>Department of Chemistry, Chonnam National University, 77 Yongbong-ro, Buk-gu, Gwangju 500-757, South Korea; jy5330@naver.com (J.Y.R.); leespy@chonnam.ac.kr (J.L.)

<sup>3</sup>LG Chem, Ltd, 188, Munji-ro, Yuseong-gu Daejeon 305-738, South Korea; eunjis@lgchem.com (E.J.S.); leekisoo@lgchem.com (K.S.L.)

\* Correspondence: bunyeoul@ajou.ac.kr; Tel: 82-31-219-1844

**Figure S1.**  $^1\text{H}$  and  $^{13}\text{C}$  NMR spectra of **1**.

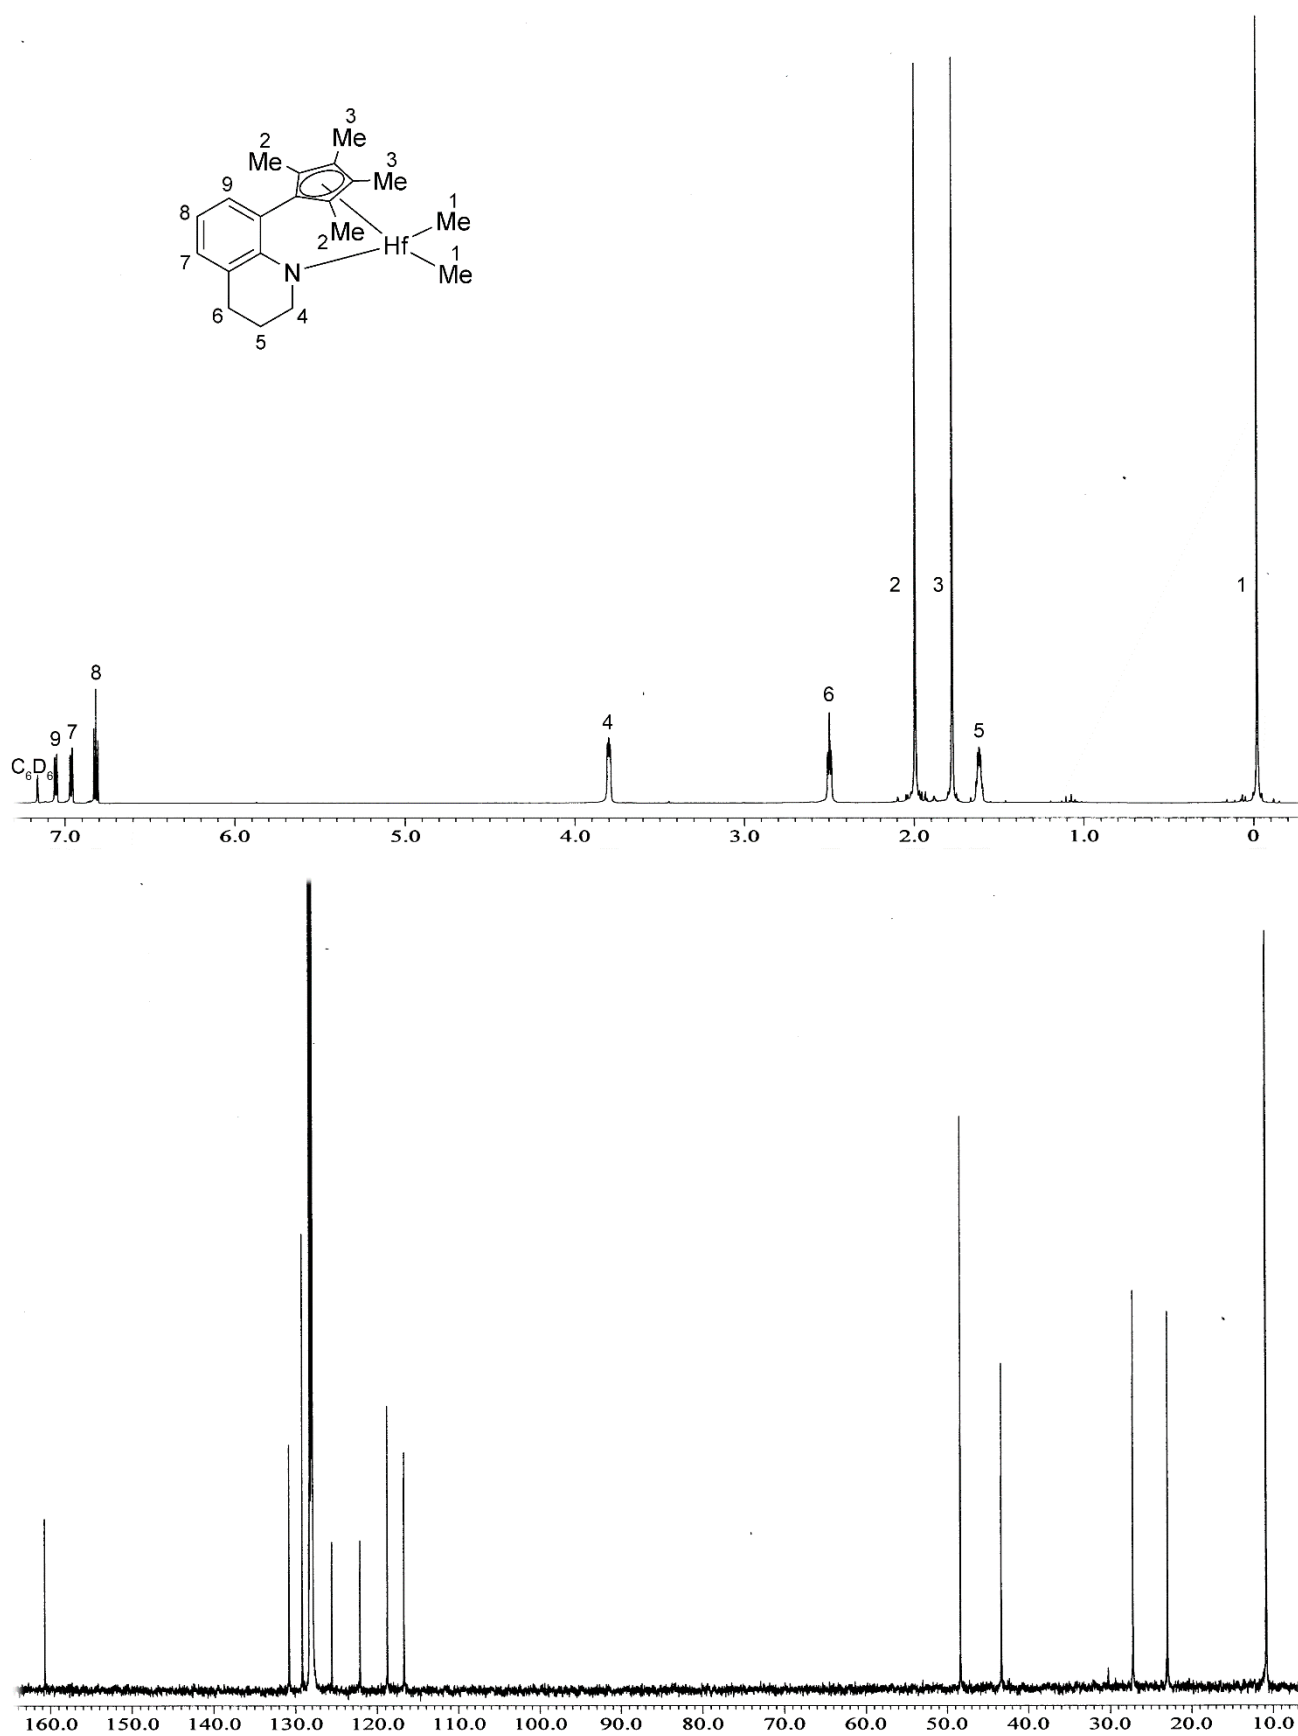

**Figure S2.**  $^1\text{H}$  and  $^{13}\text{C}$  NMR spectra of **2**.

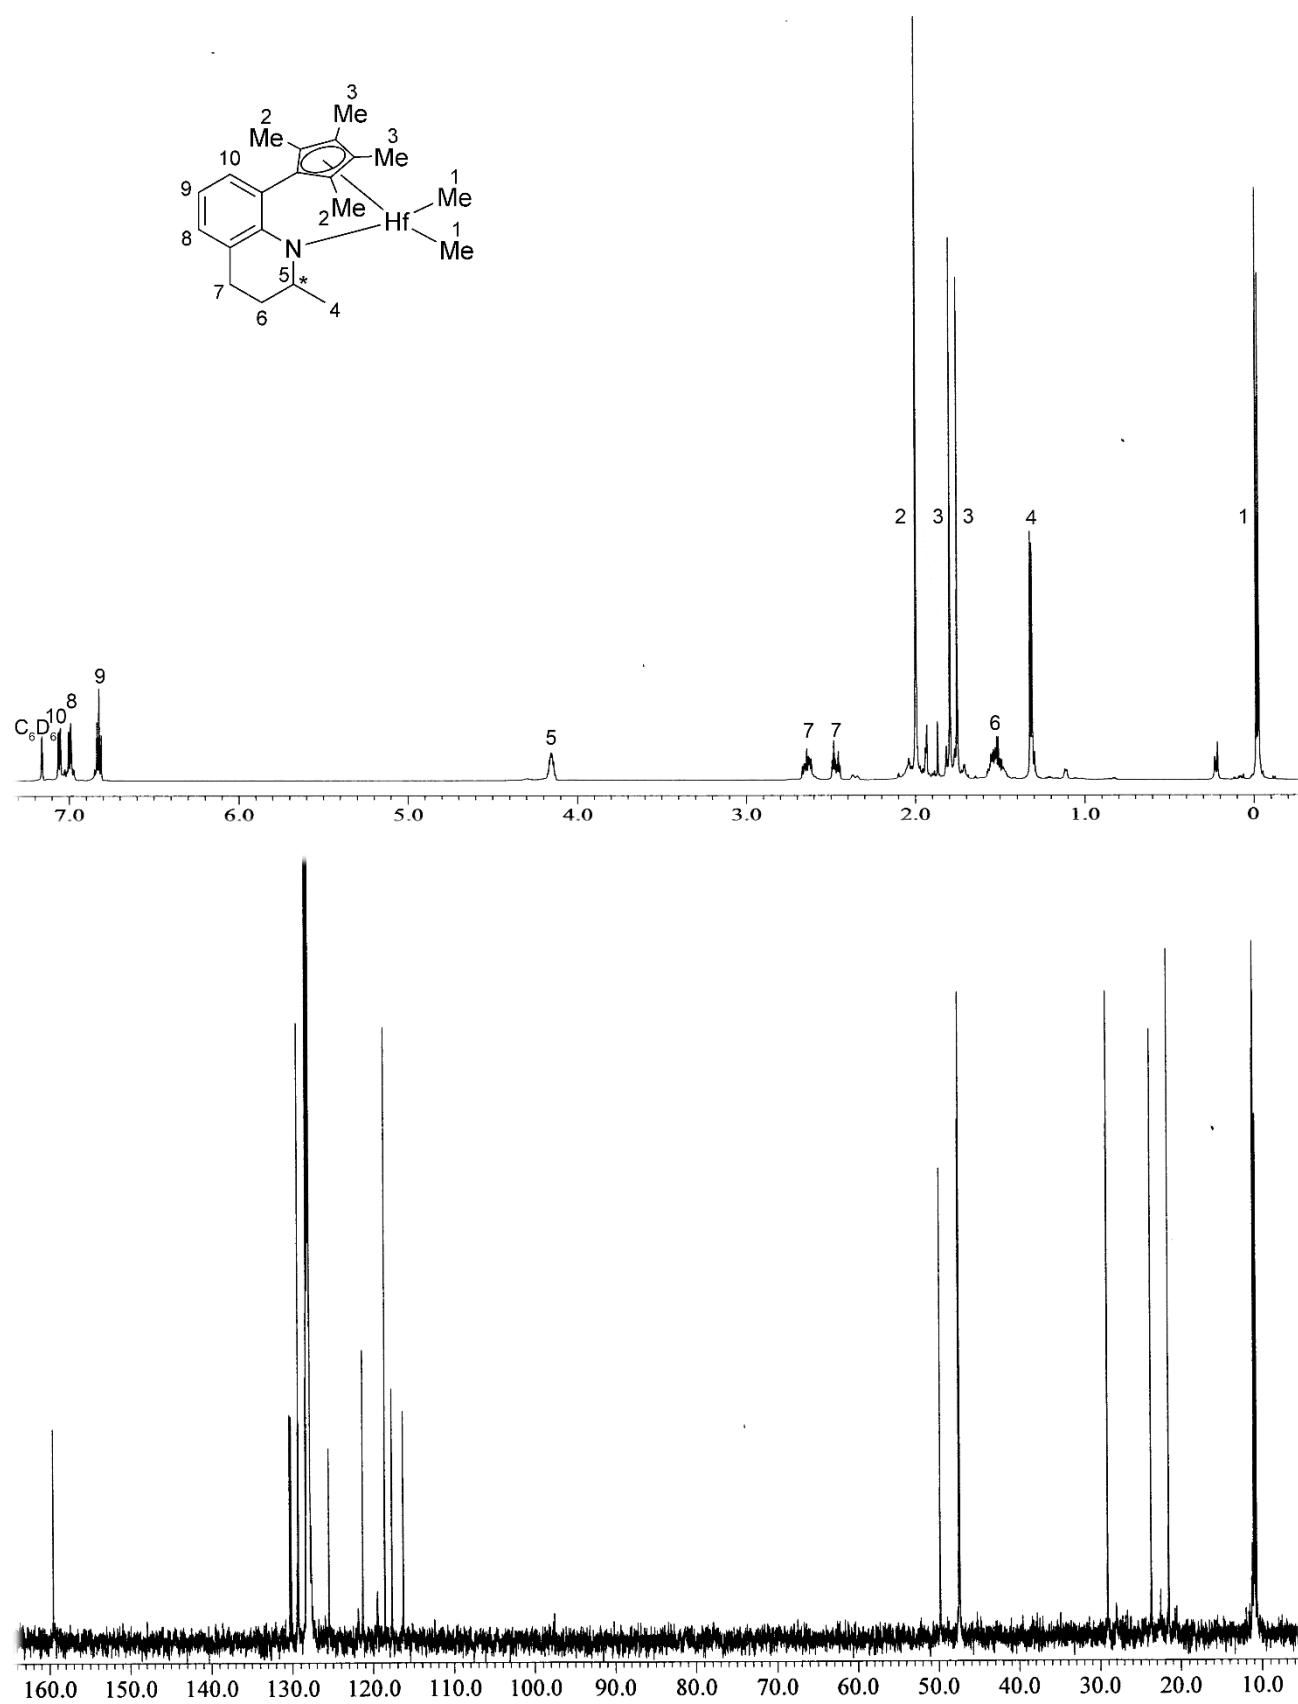

**Figure S3.**  $^1\text{H}$  and  $^{13}\text{C}$  NMR spectra of **3**.

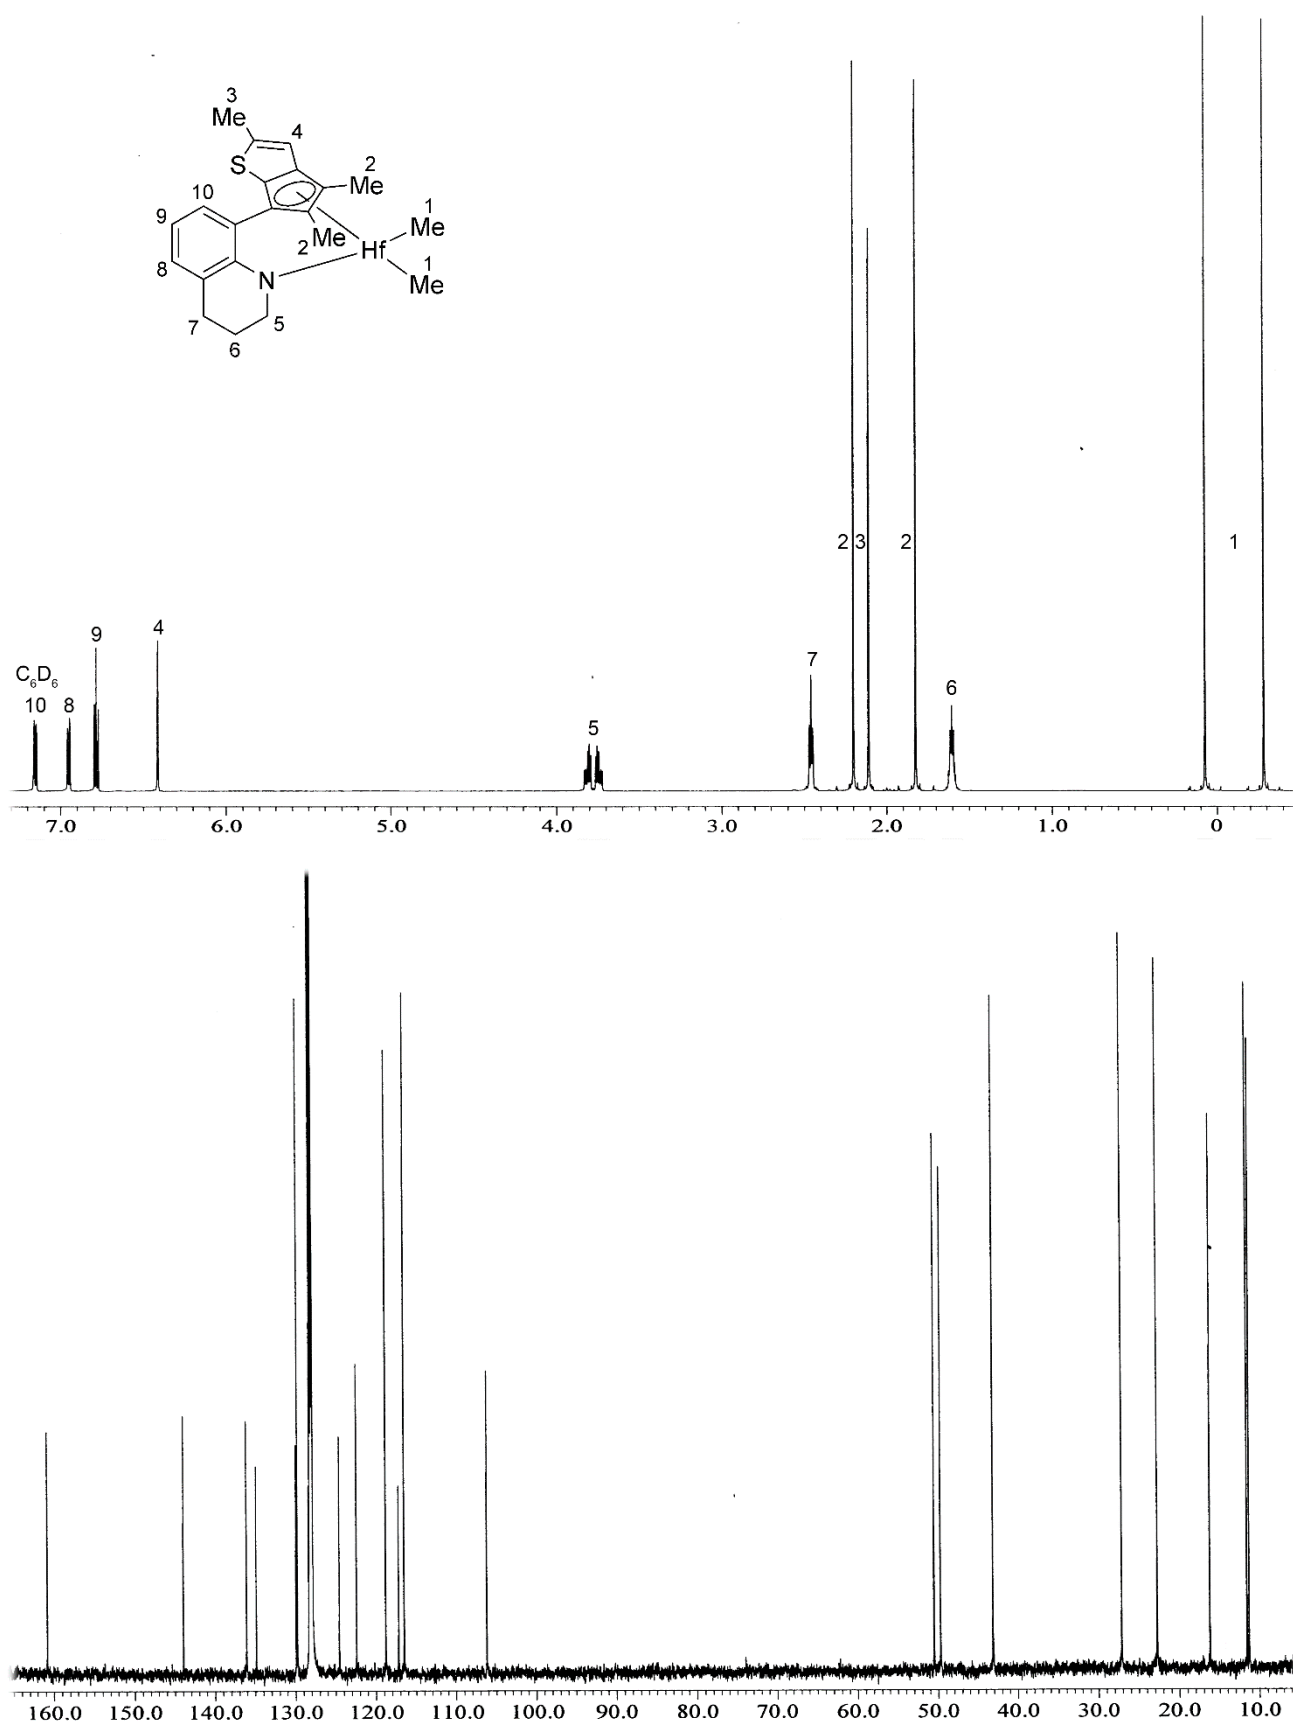

**Figure S4.**  $^1\text{H}$  and  $^{13}\text{C}$  NMR spectra of **4**.

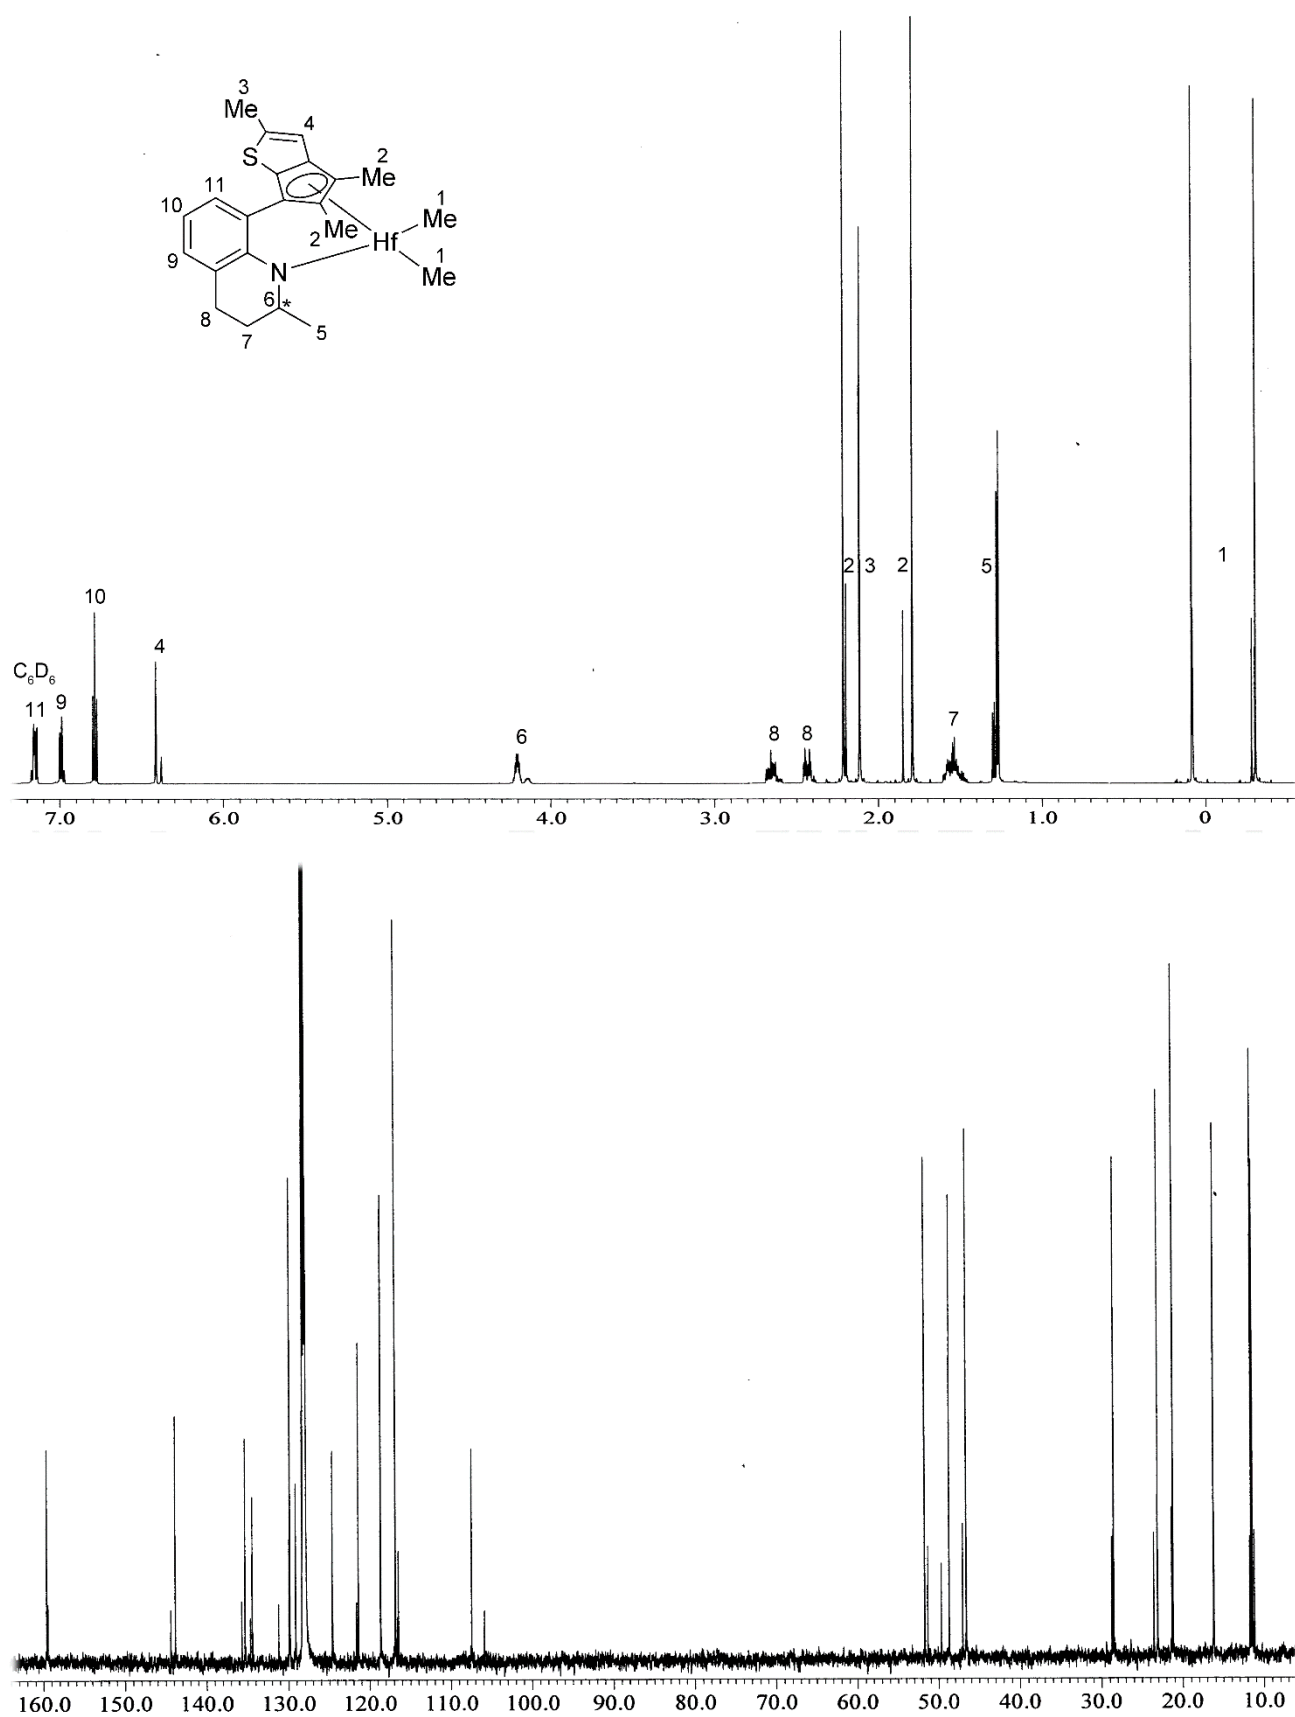

**Figure S5.**  $^1\text{H}$  and  $^{13}\text{C}$  NMR spectra of **5**.

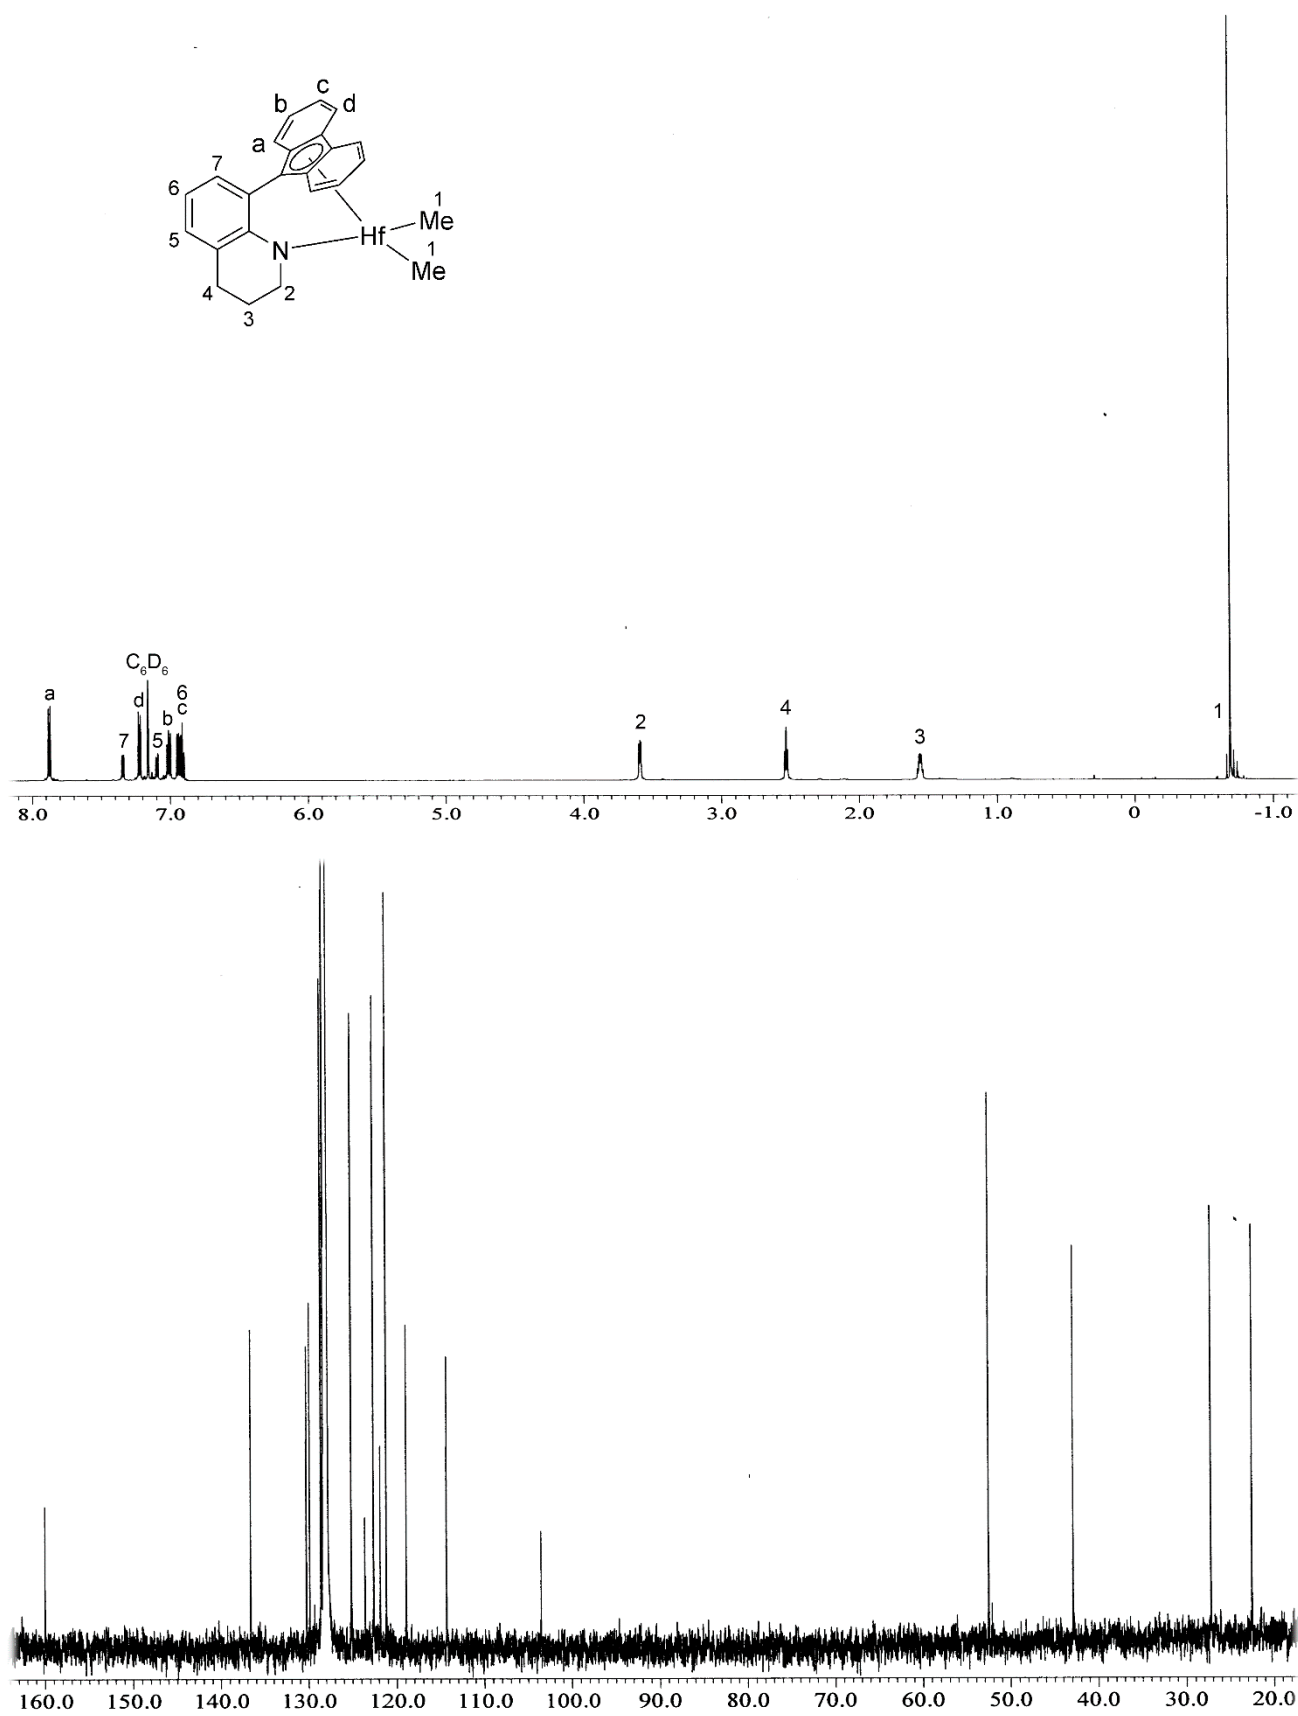

**Figure S6.**  $^1\text{H}$  and  $^{13}\text{C}$  NMR spectra of **6**.

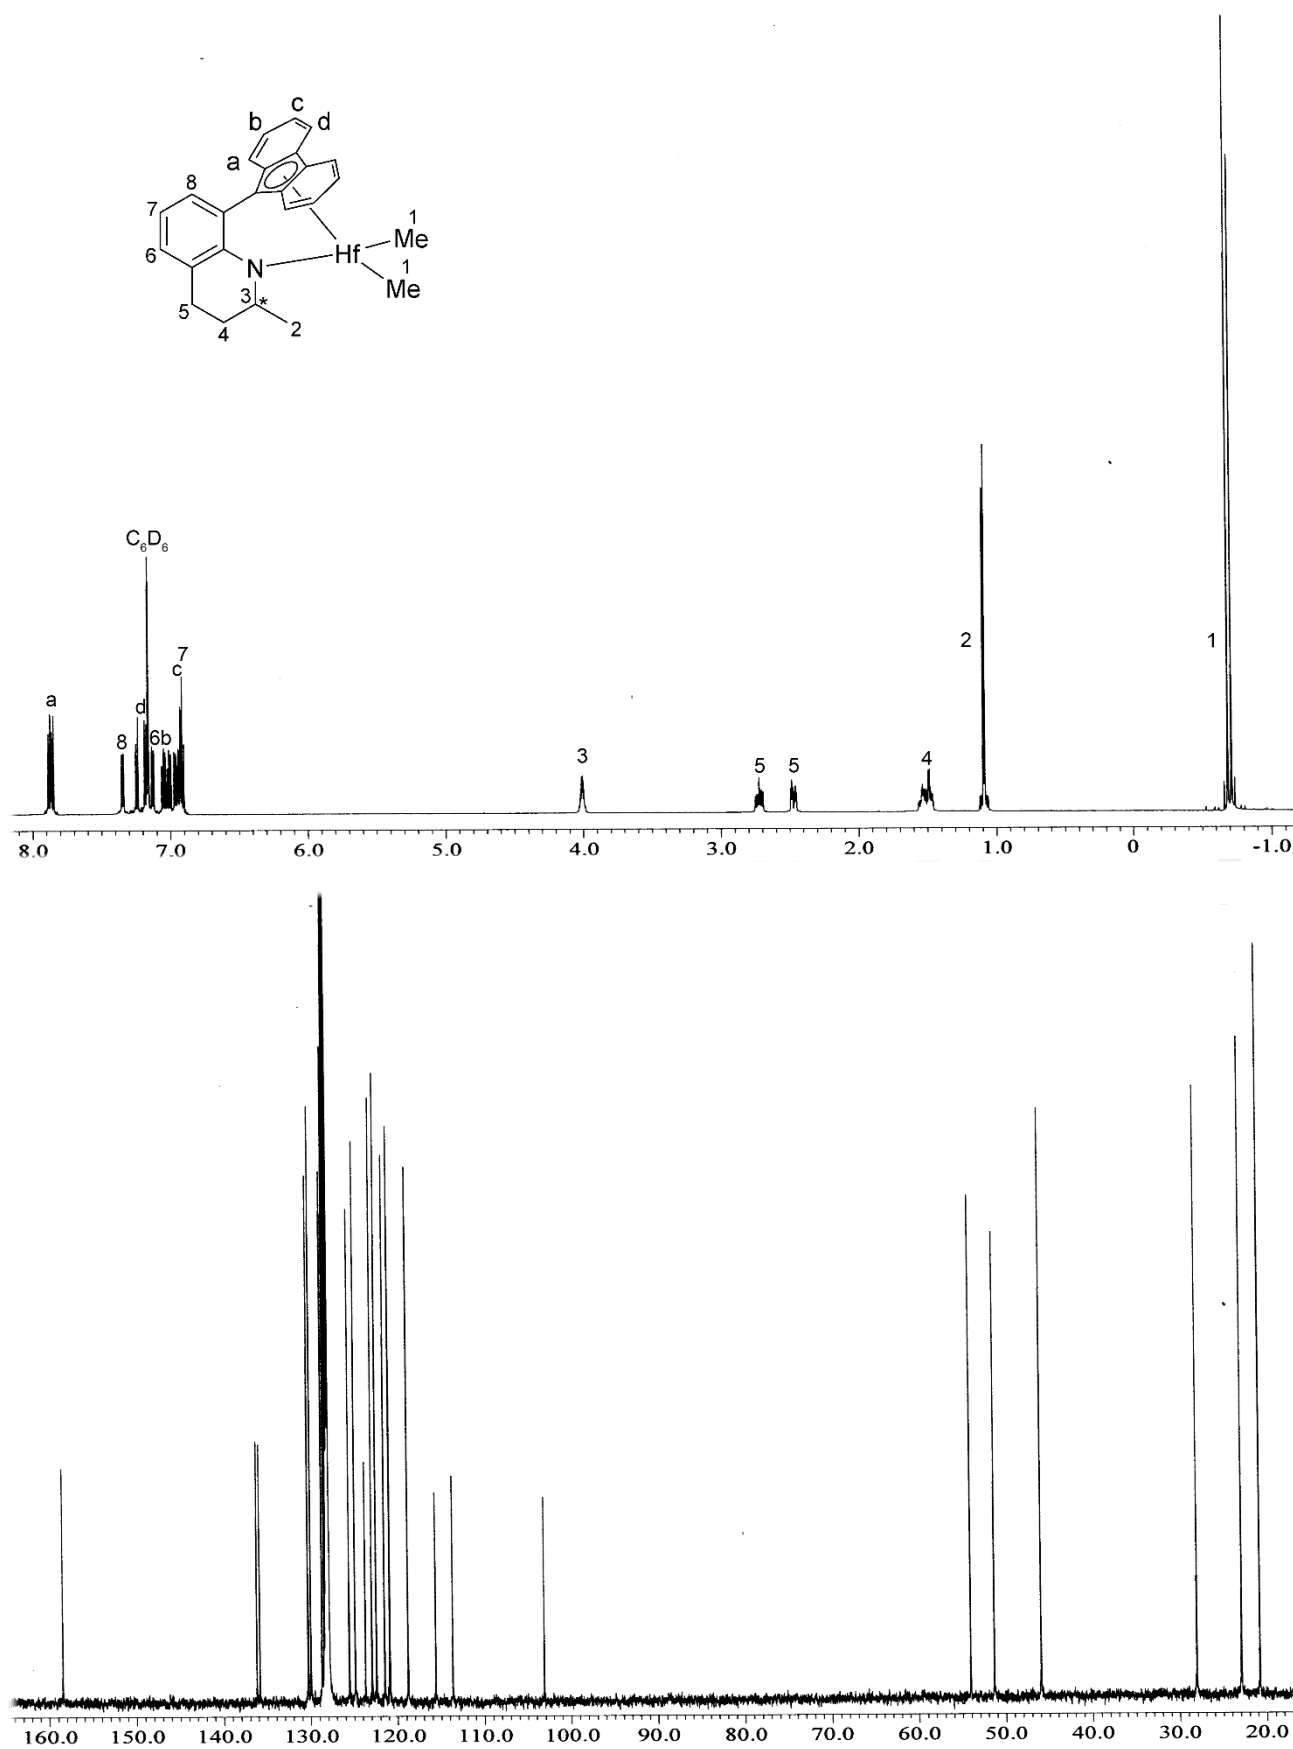

**Figure S7.**  $^1\text{H}$  and  $^{13}\text{C}$  NMR spectra of **9**.

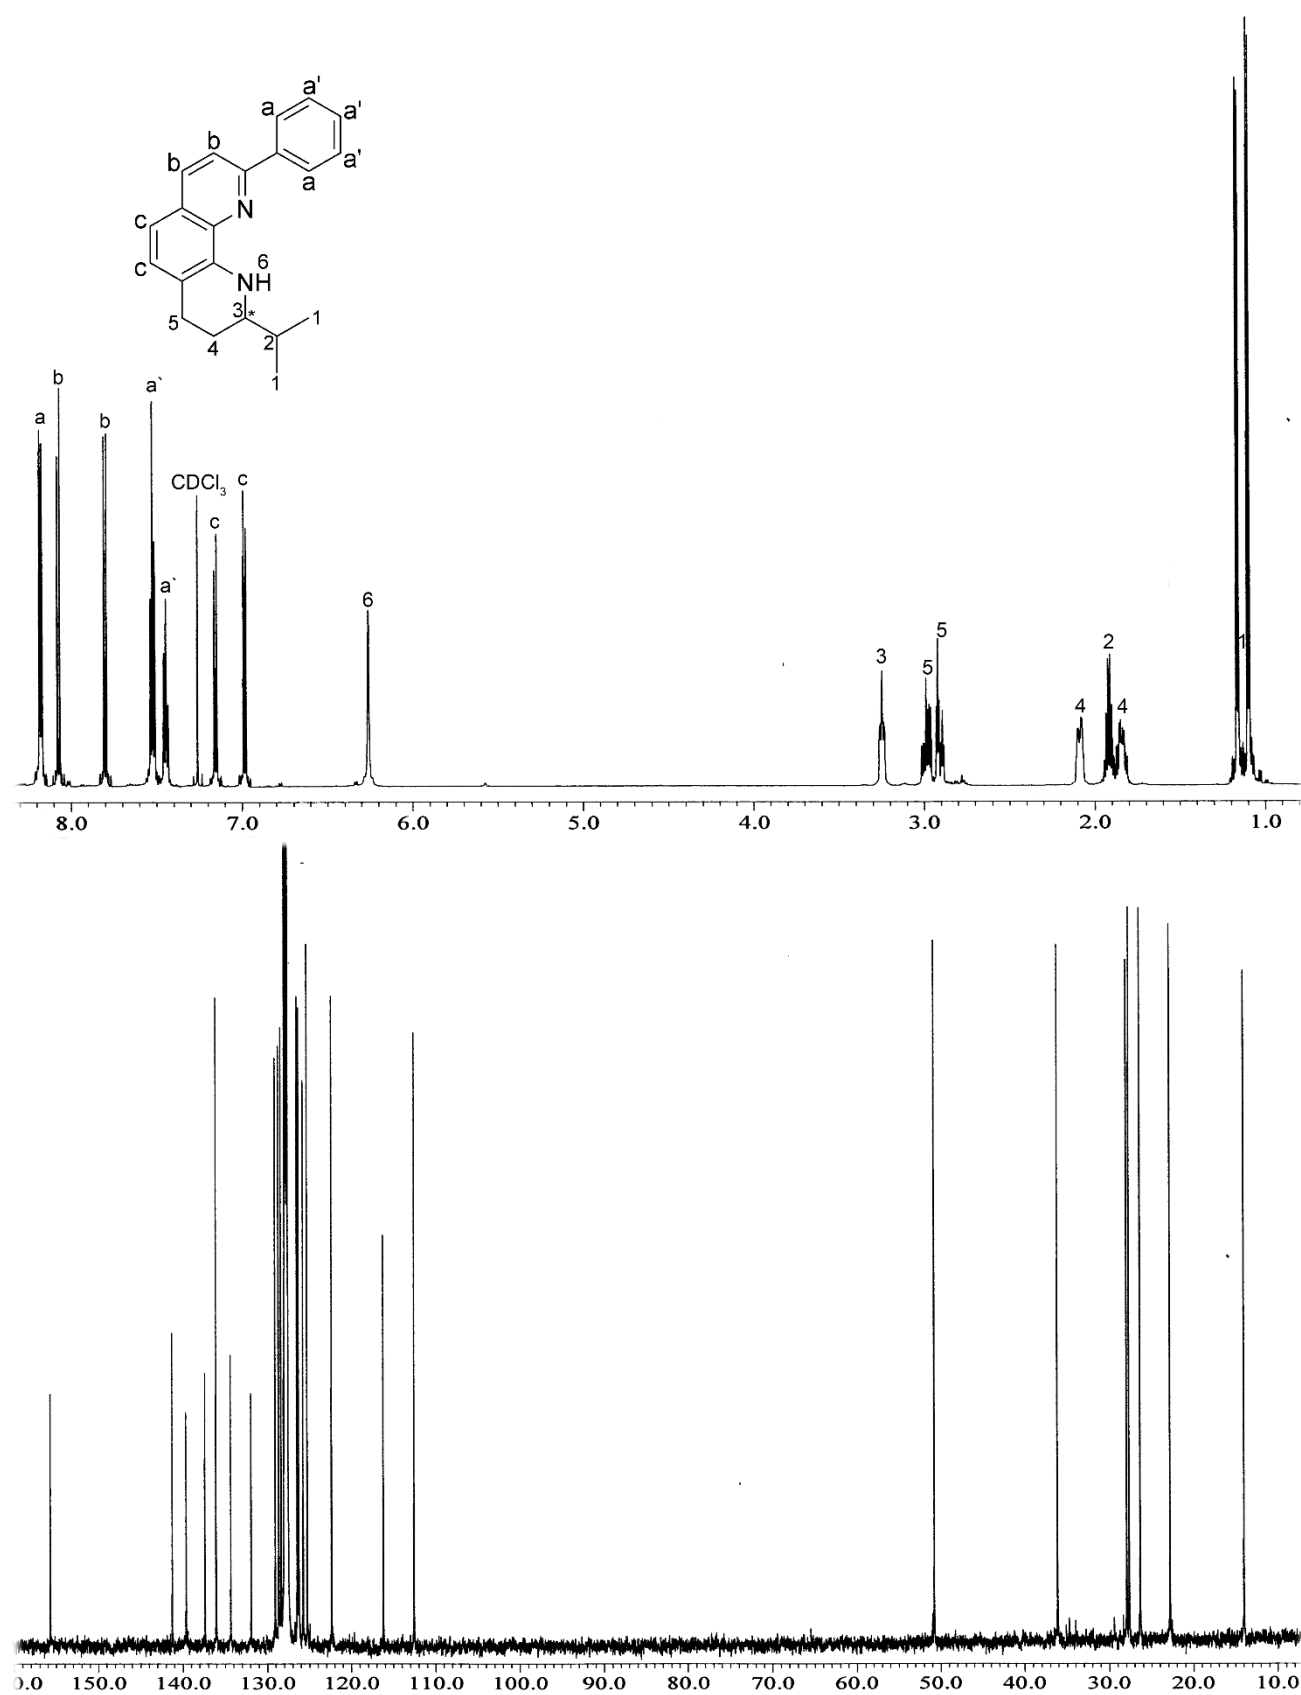



**Figure S8.**  $^1\text{H}$  and  $^{13}\text{C}$  NMR spectra of **10**.

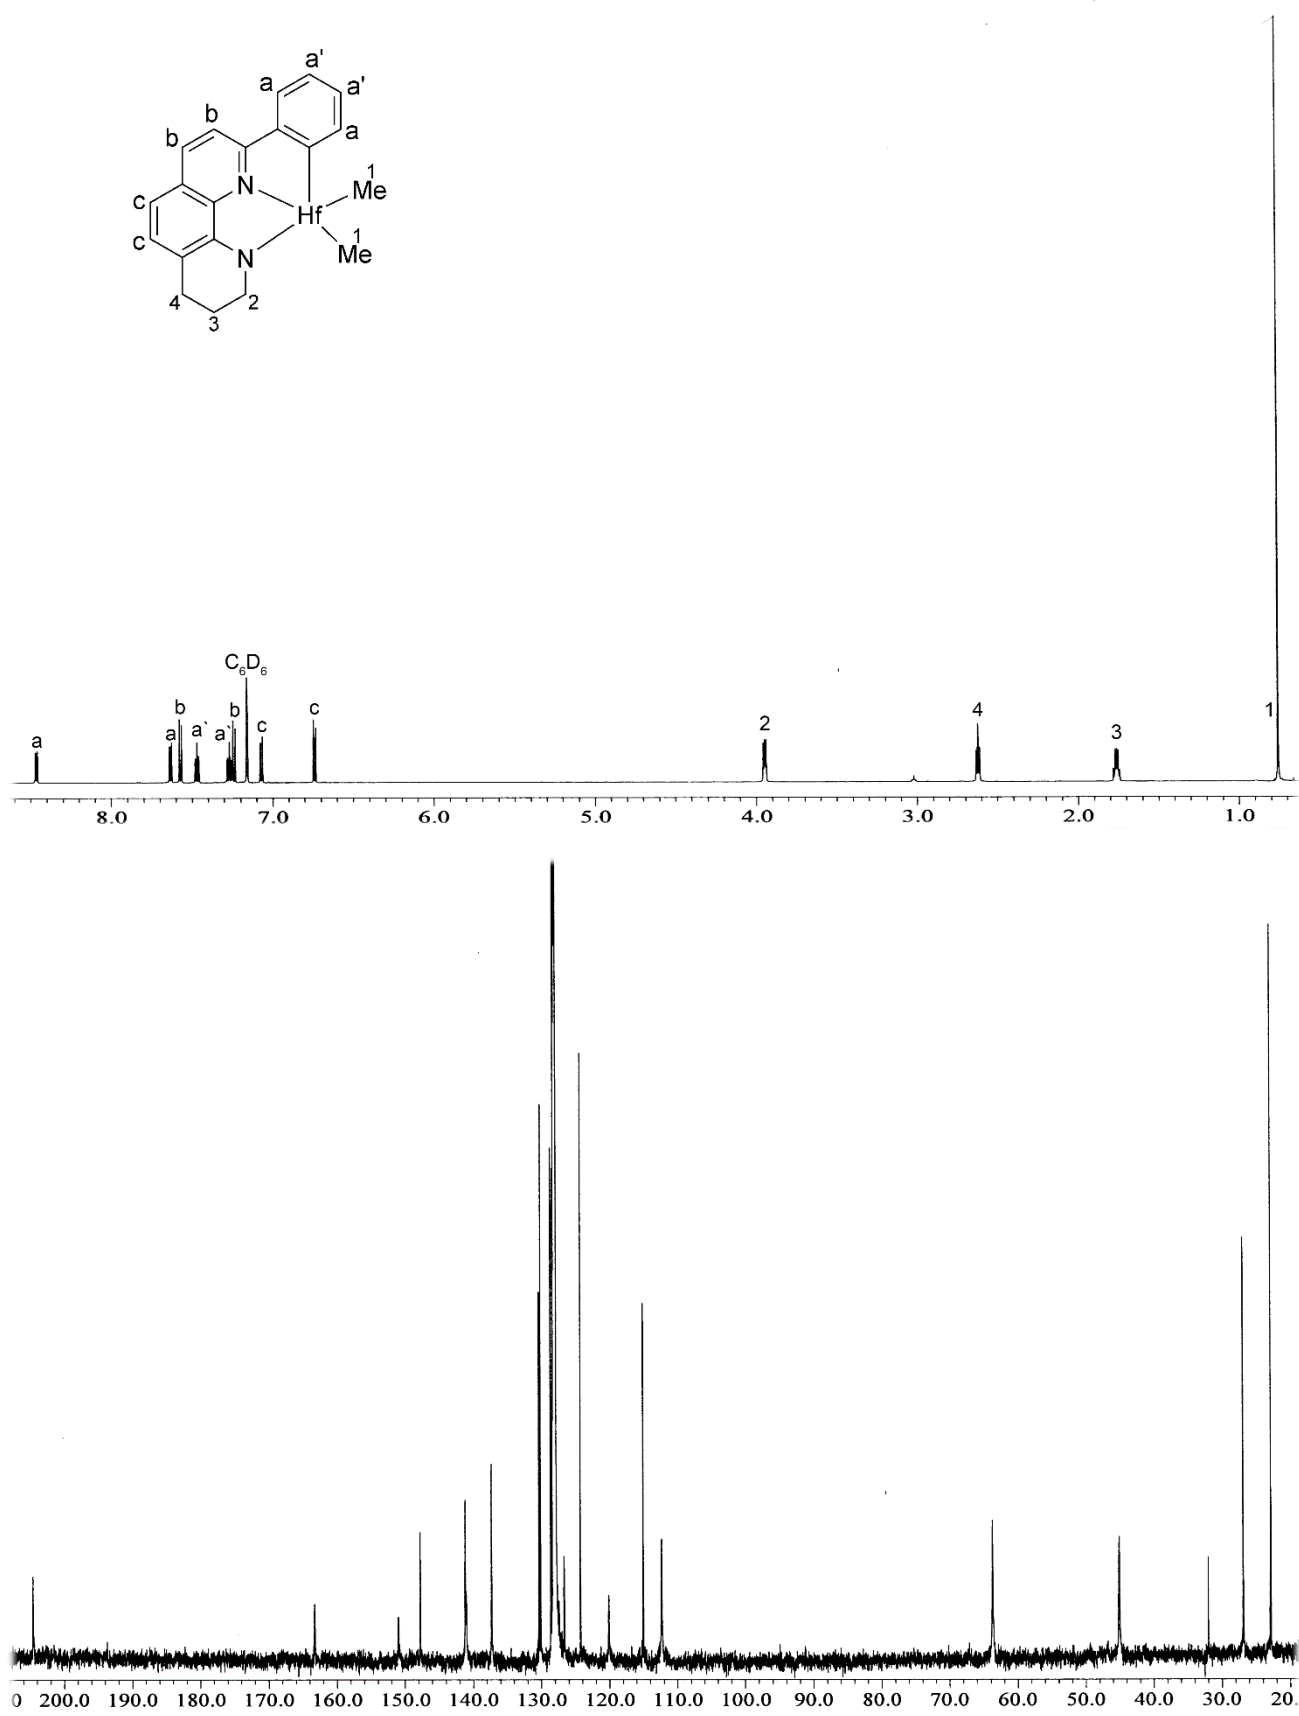

**Figure S9.**  $^1\text{H}$  and  $^{13}\text{C}$  NMR spectra of **11**.

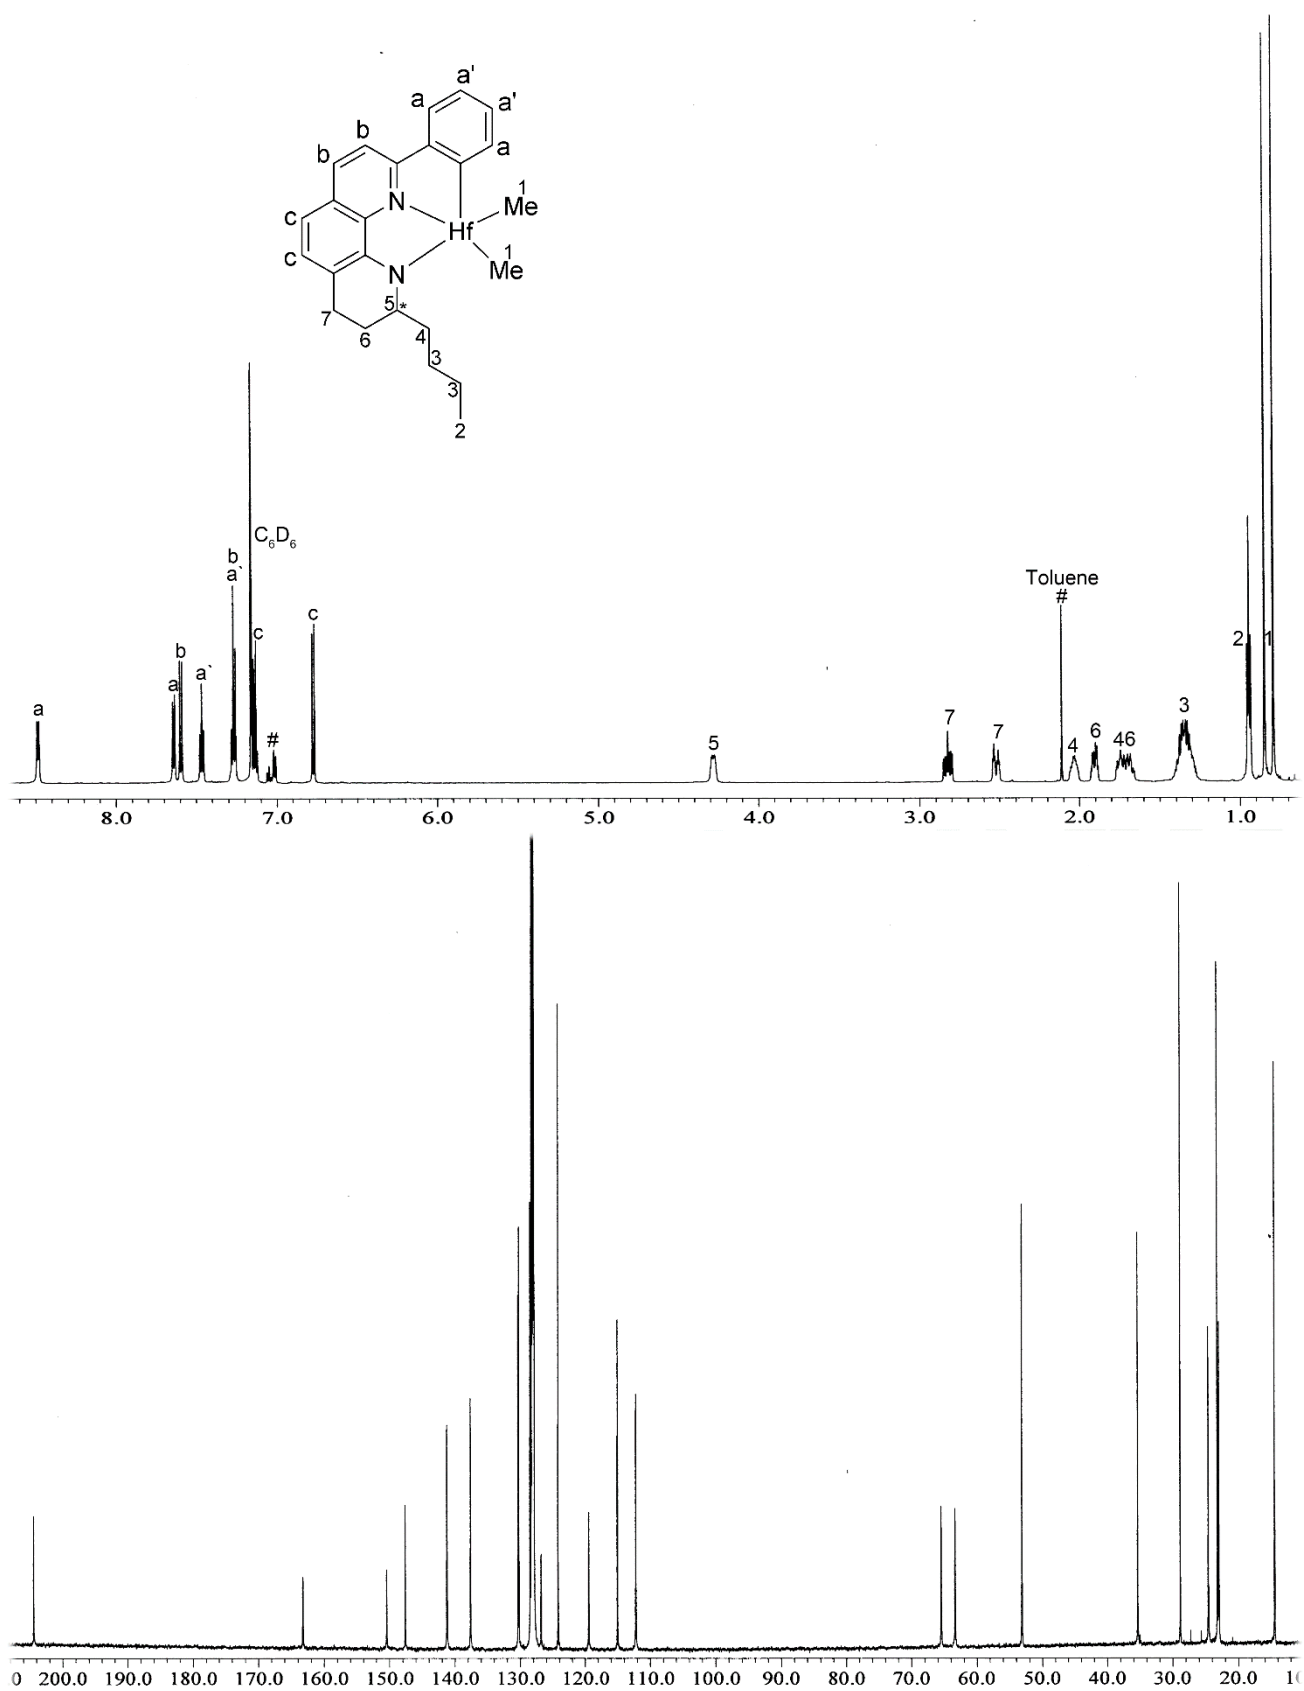

**Figure S10.**  $^1\text{H}$  and  $^{13}\text{C}$  NMR spectra of **12**.

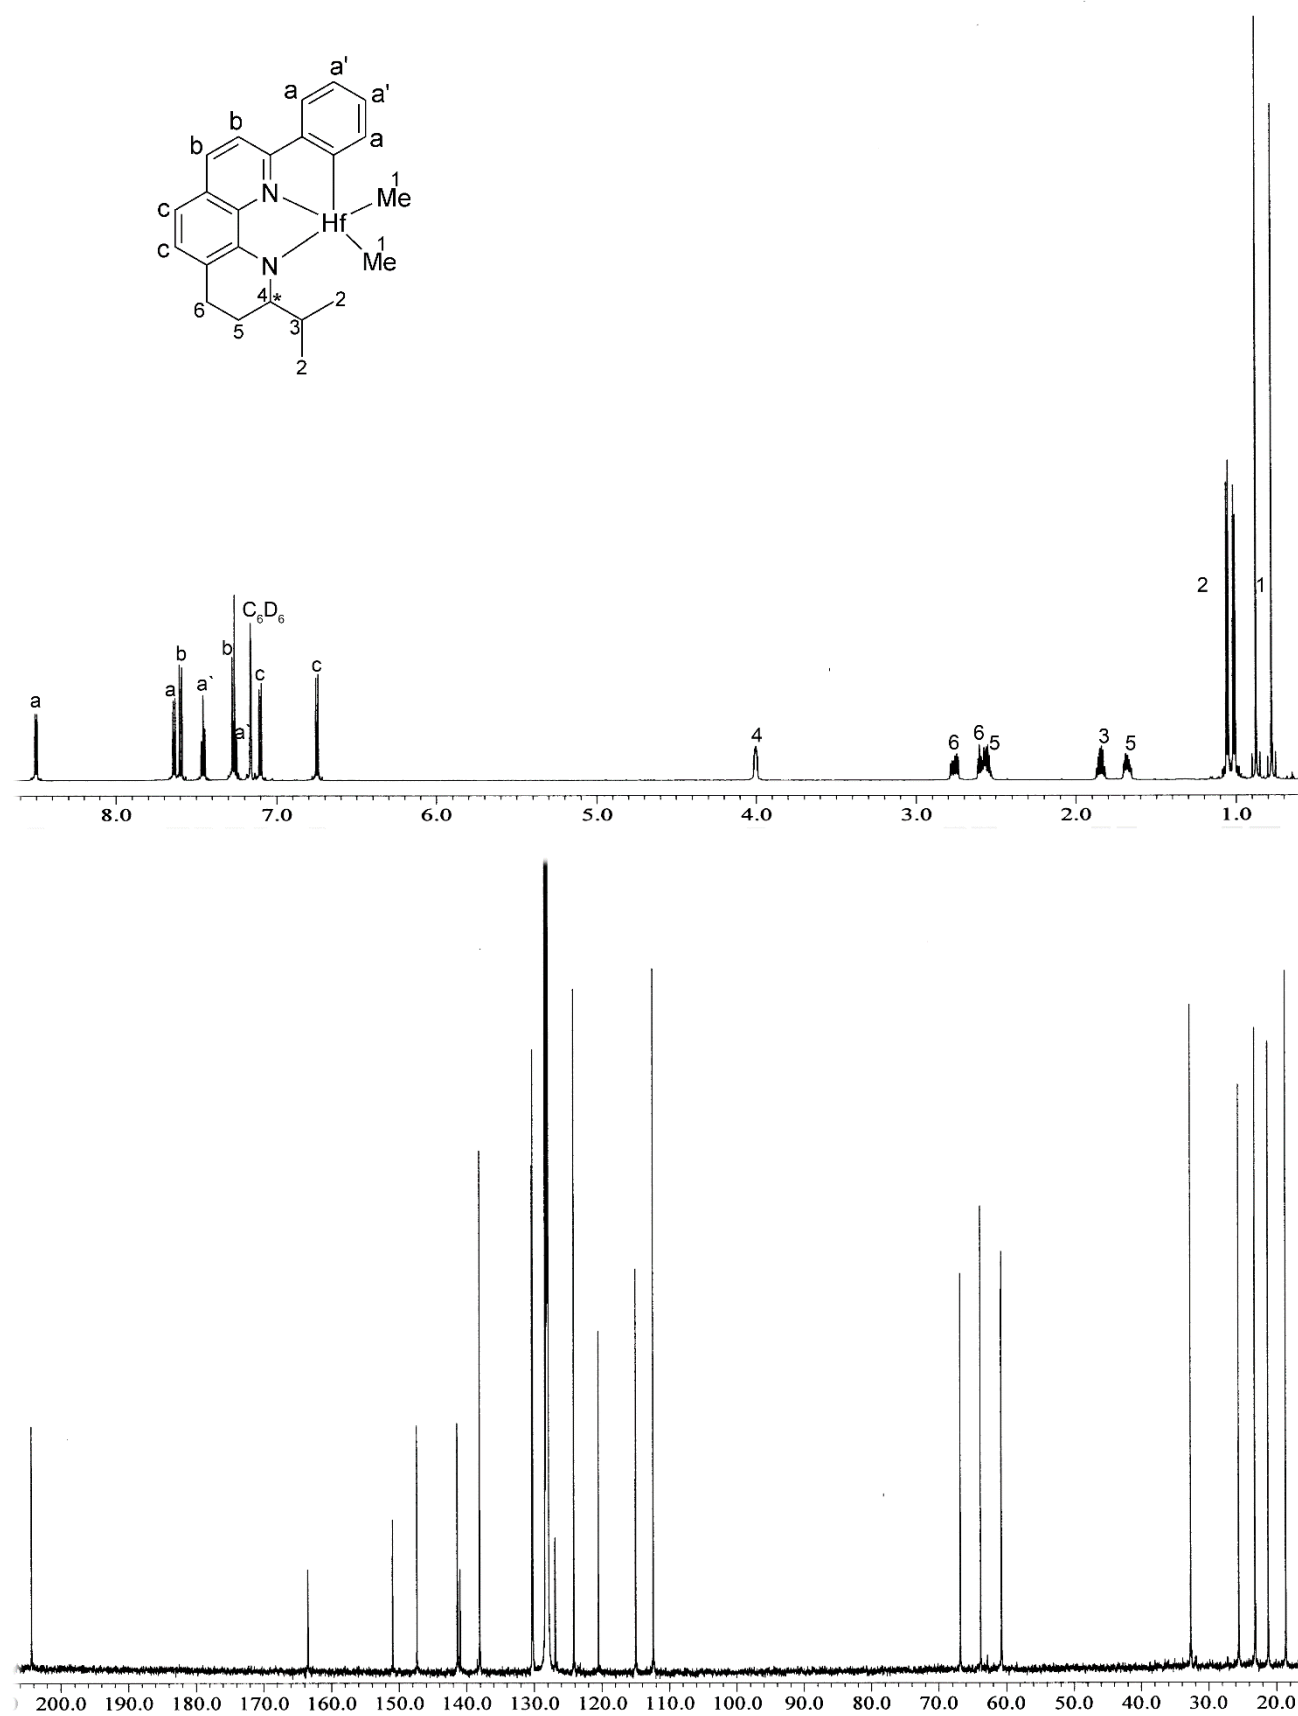

**Figure S11.**  $^1\text{H}$  and  $^{13}\text{C}$  NMR spectra of **13**.

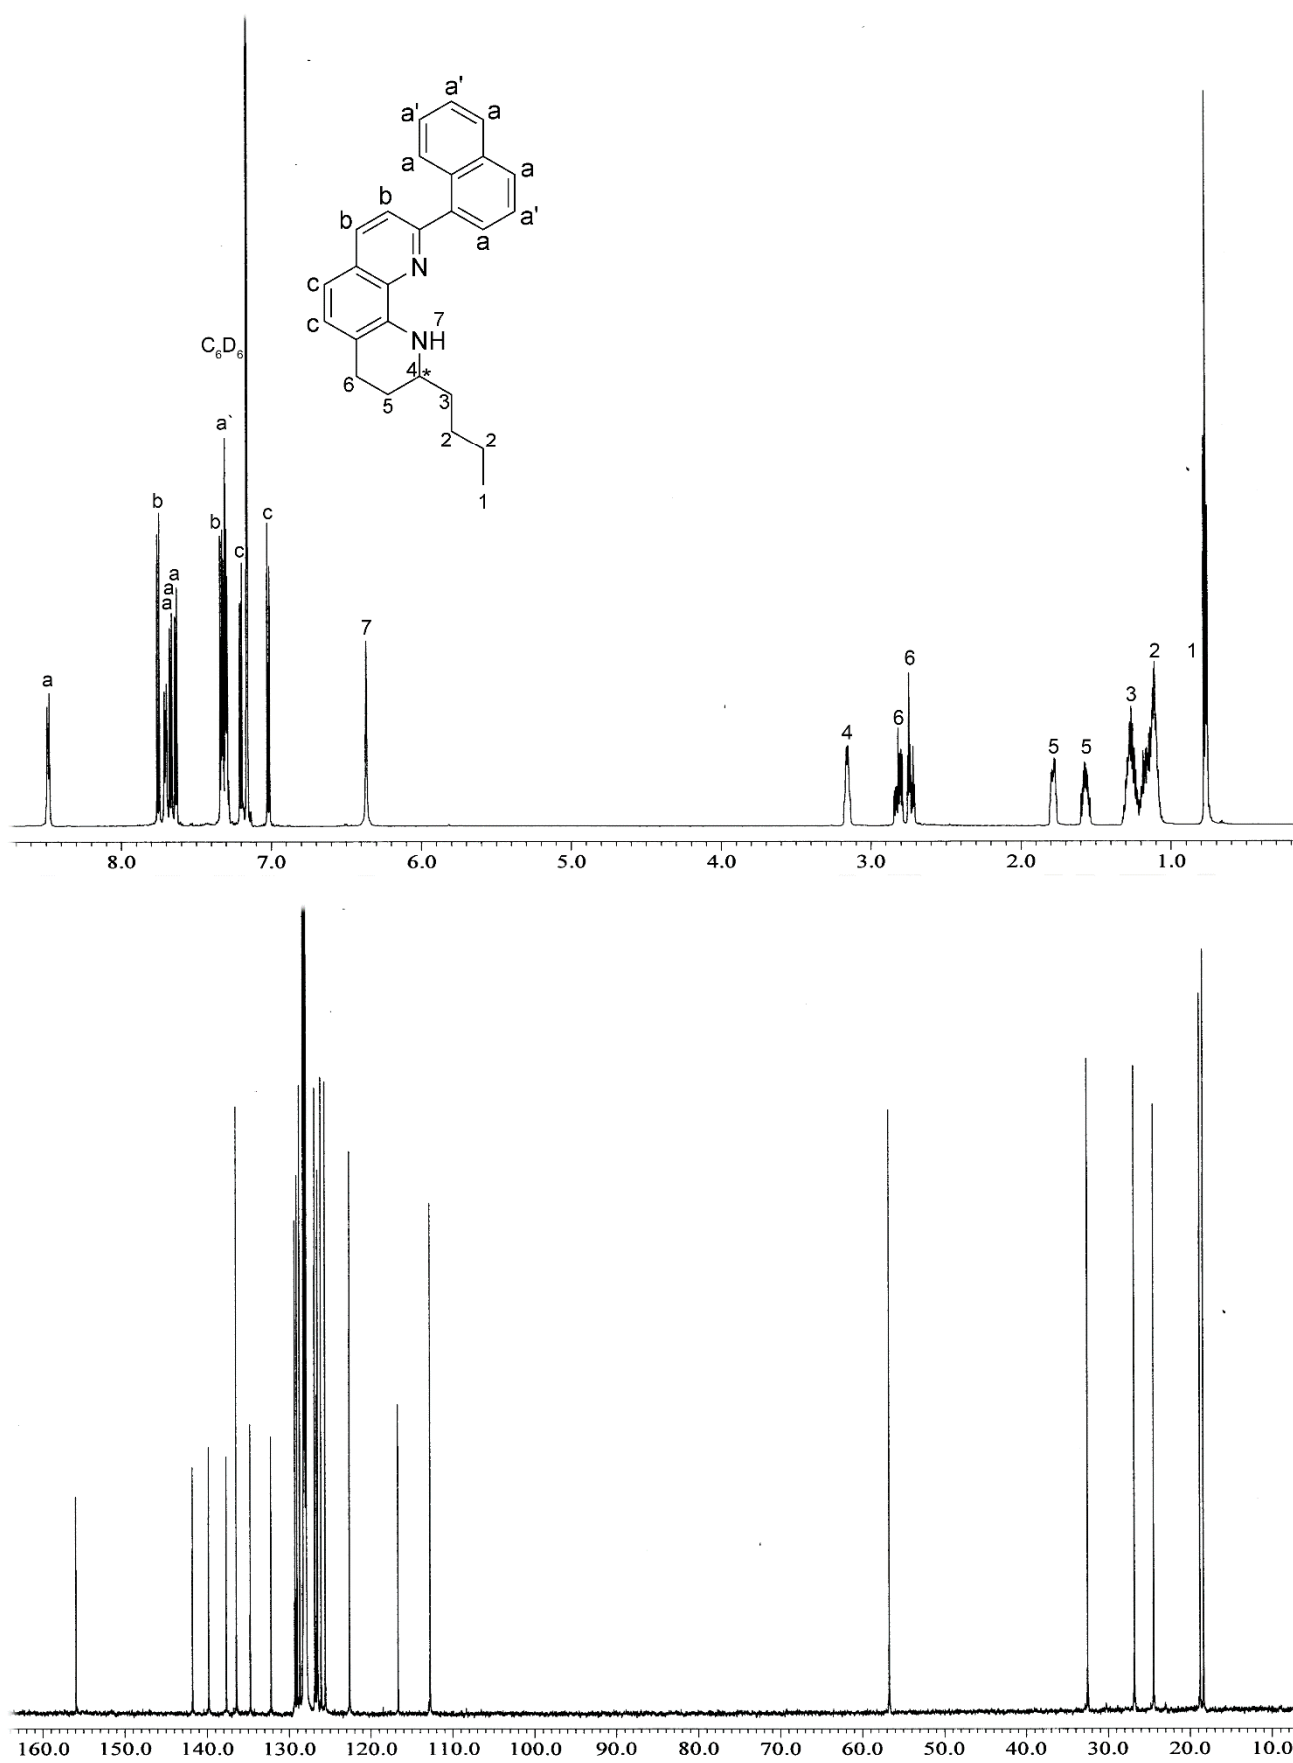

**Figure S12.**  $^1\text{H}$  and  $^{13}\text{C}$  NMR spectra of **14**.

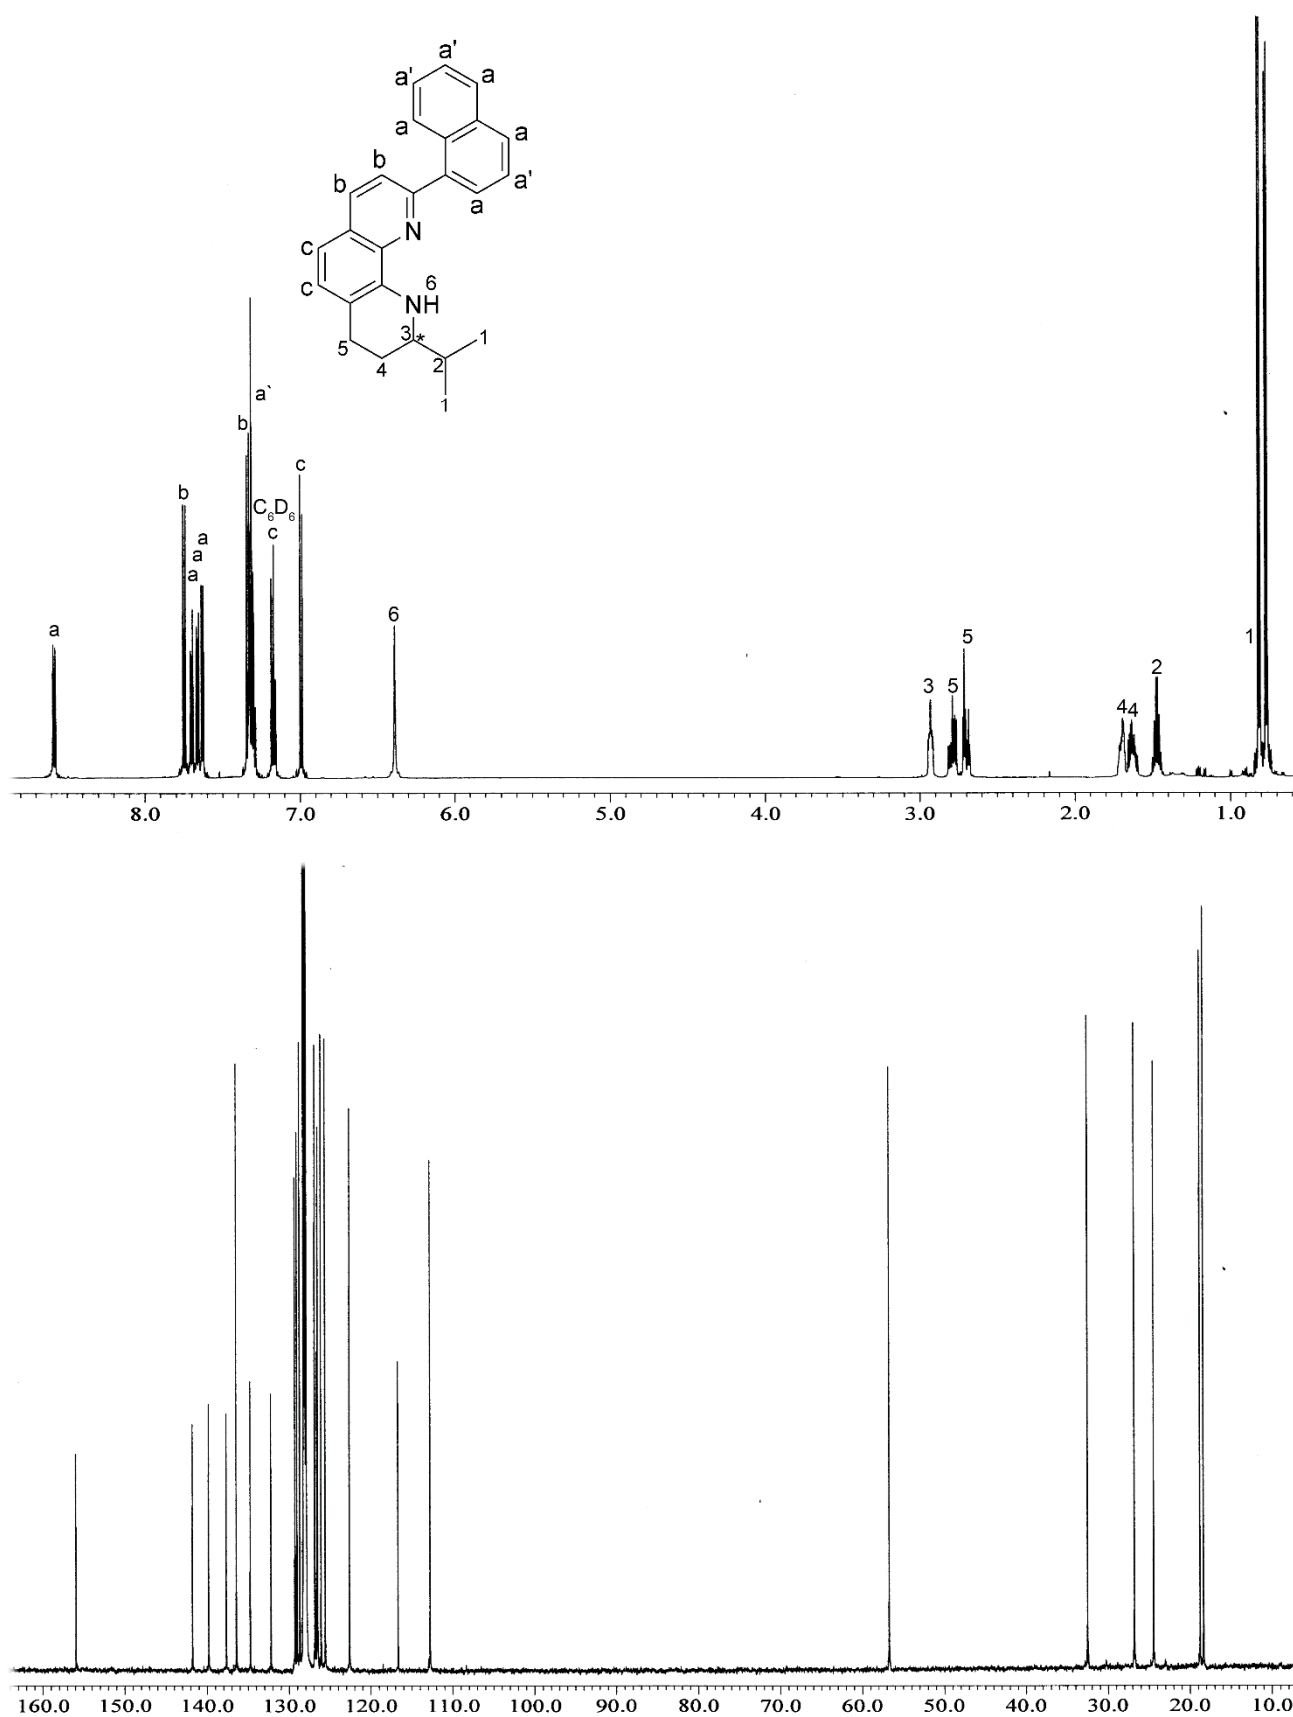

**Figure S13.**  $^1\text{H}$  and  $^{13}\text{C}$  NMR spectra of **15**.

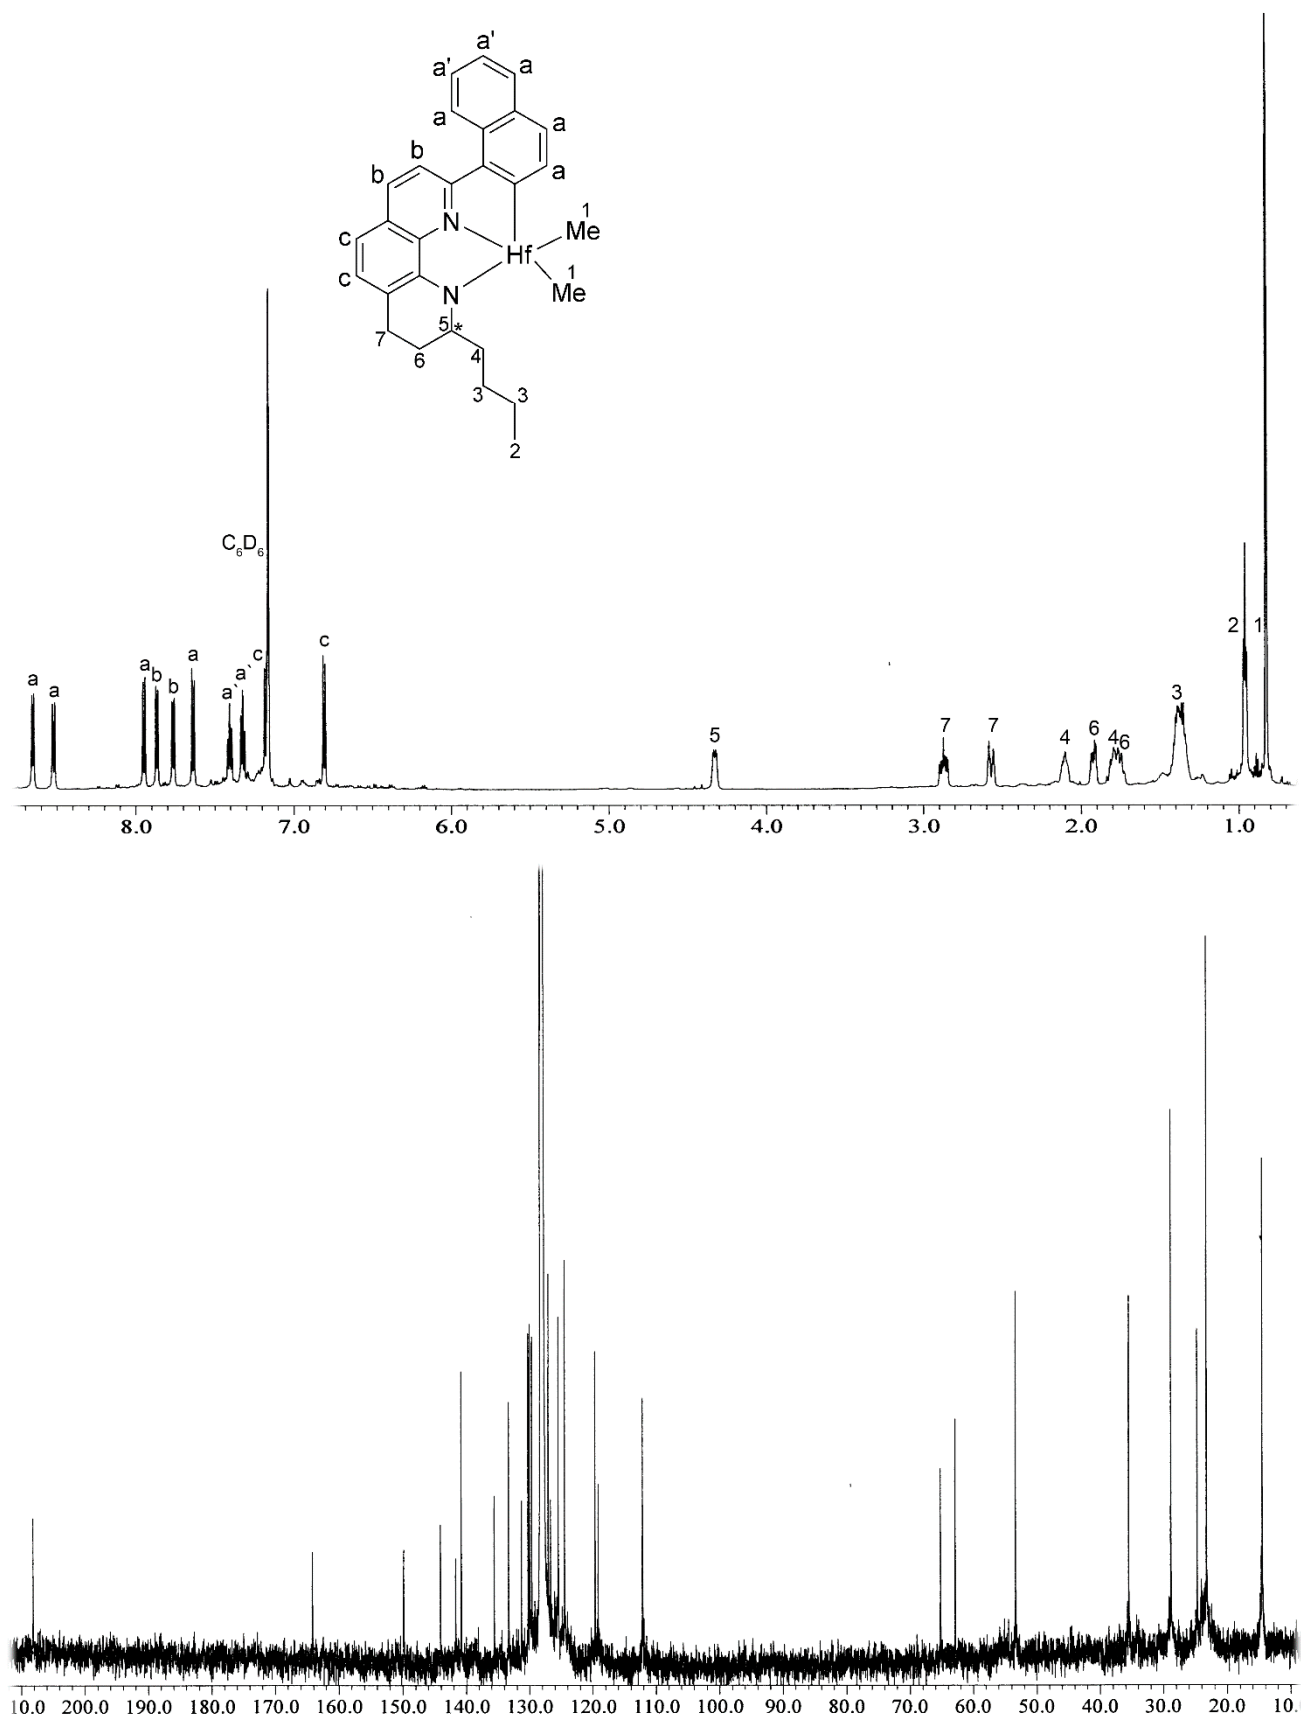

**Figure S14.**  $^1\text{H}$  and  $^{13}\text{C}$  NMR spectra of **16**.

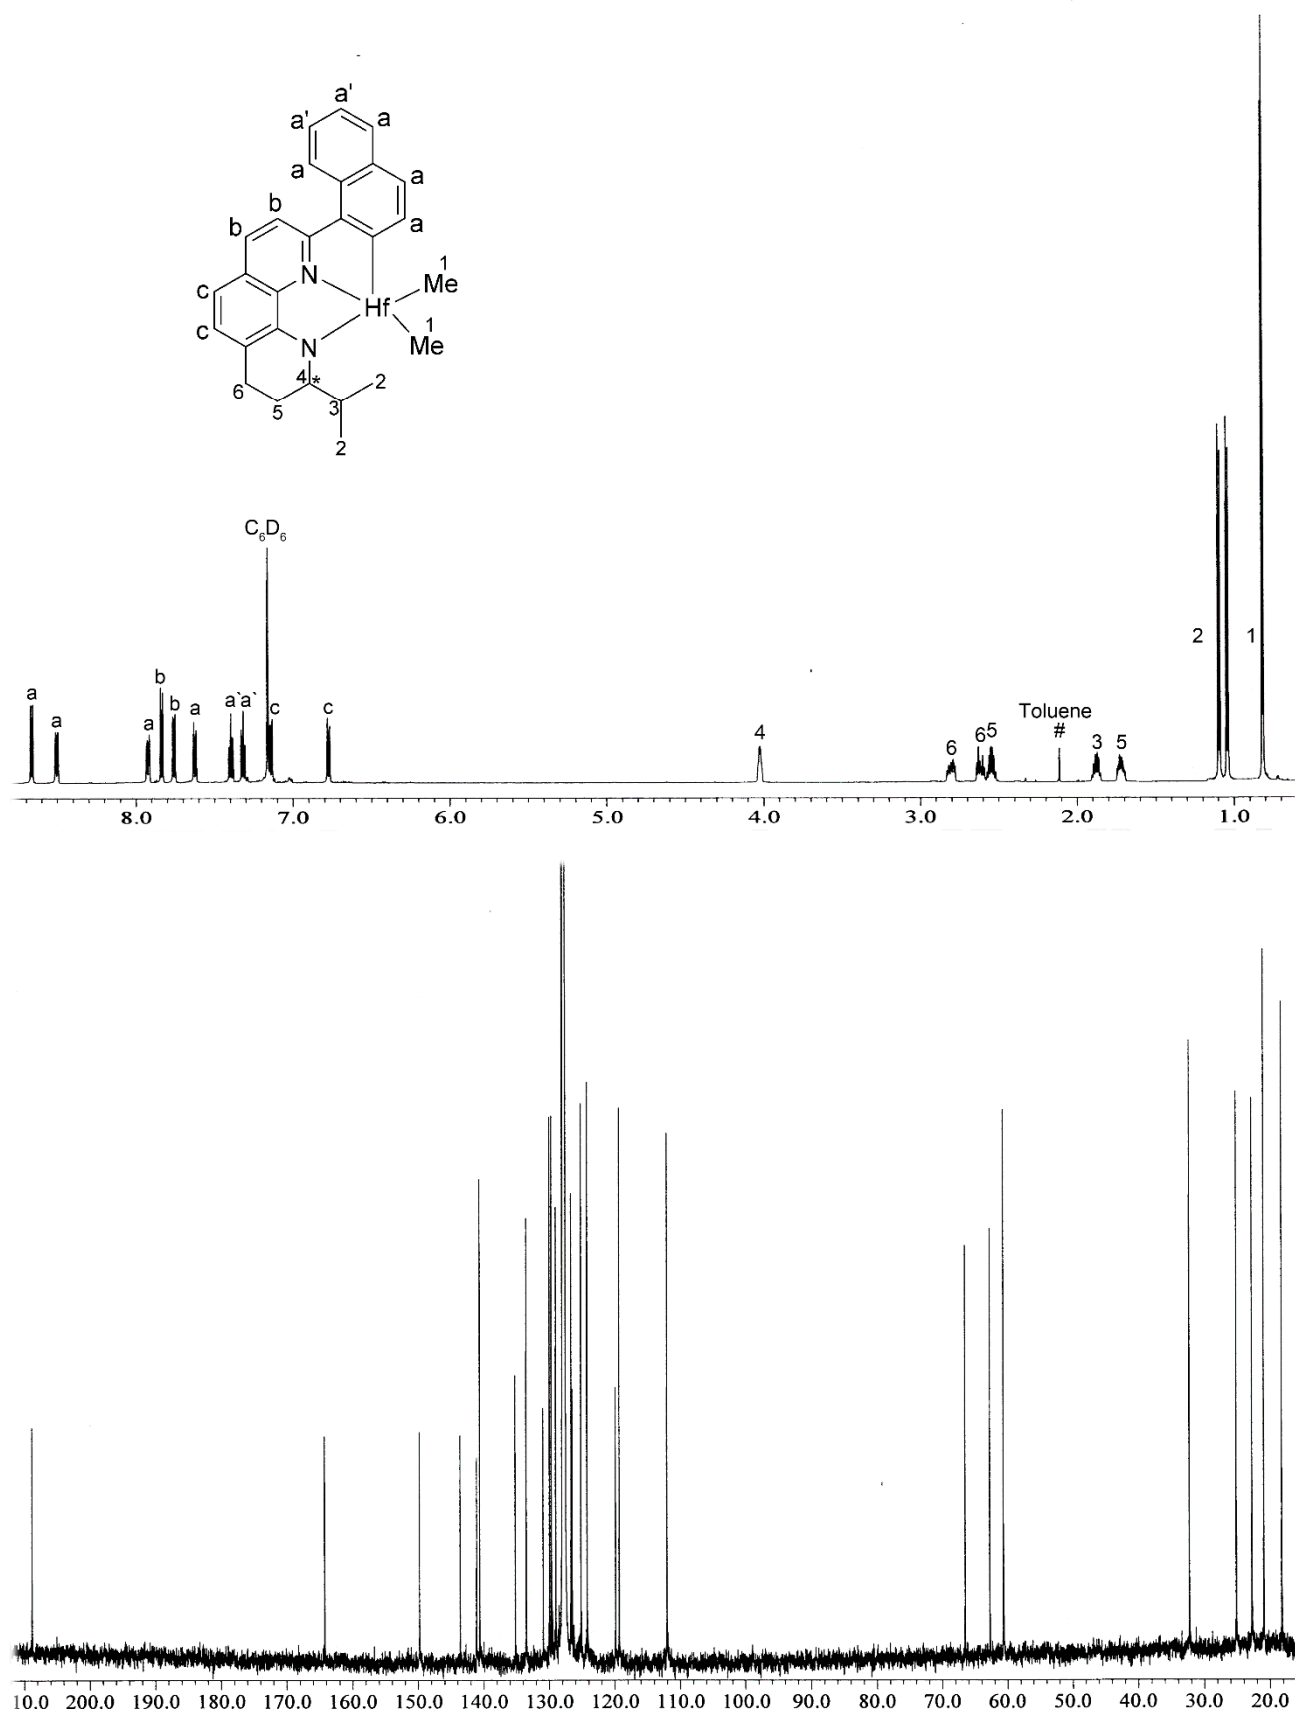

**Figure S15.**  $^1\text{H}$  and  $^{13}\text{C}$  NMR spectra recorded on the reaction of **1** with  $[(\text{C}_{18}\text{H}_{37})_2\text{N}(\text{H})\text{Me}]^+[\text{B}(\text{C}_6\text{F}_5)_4]^-$  at 3 h.

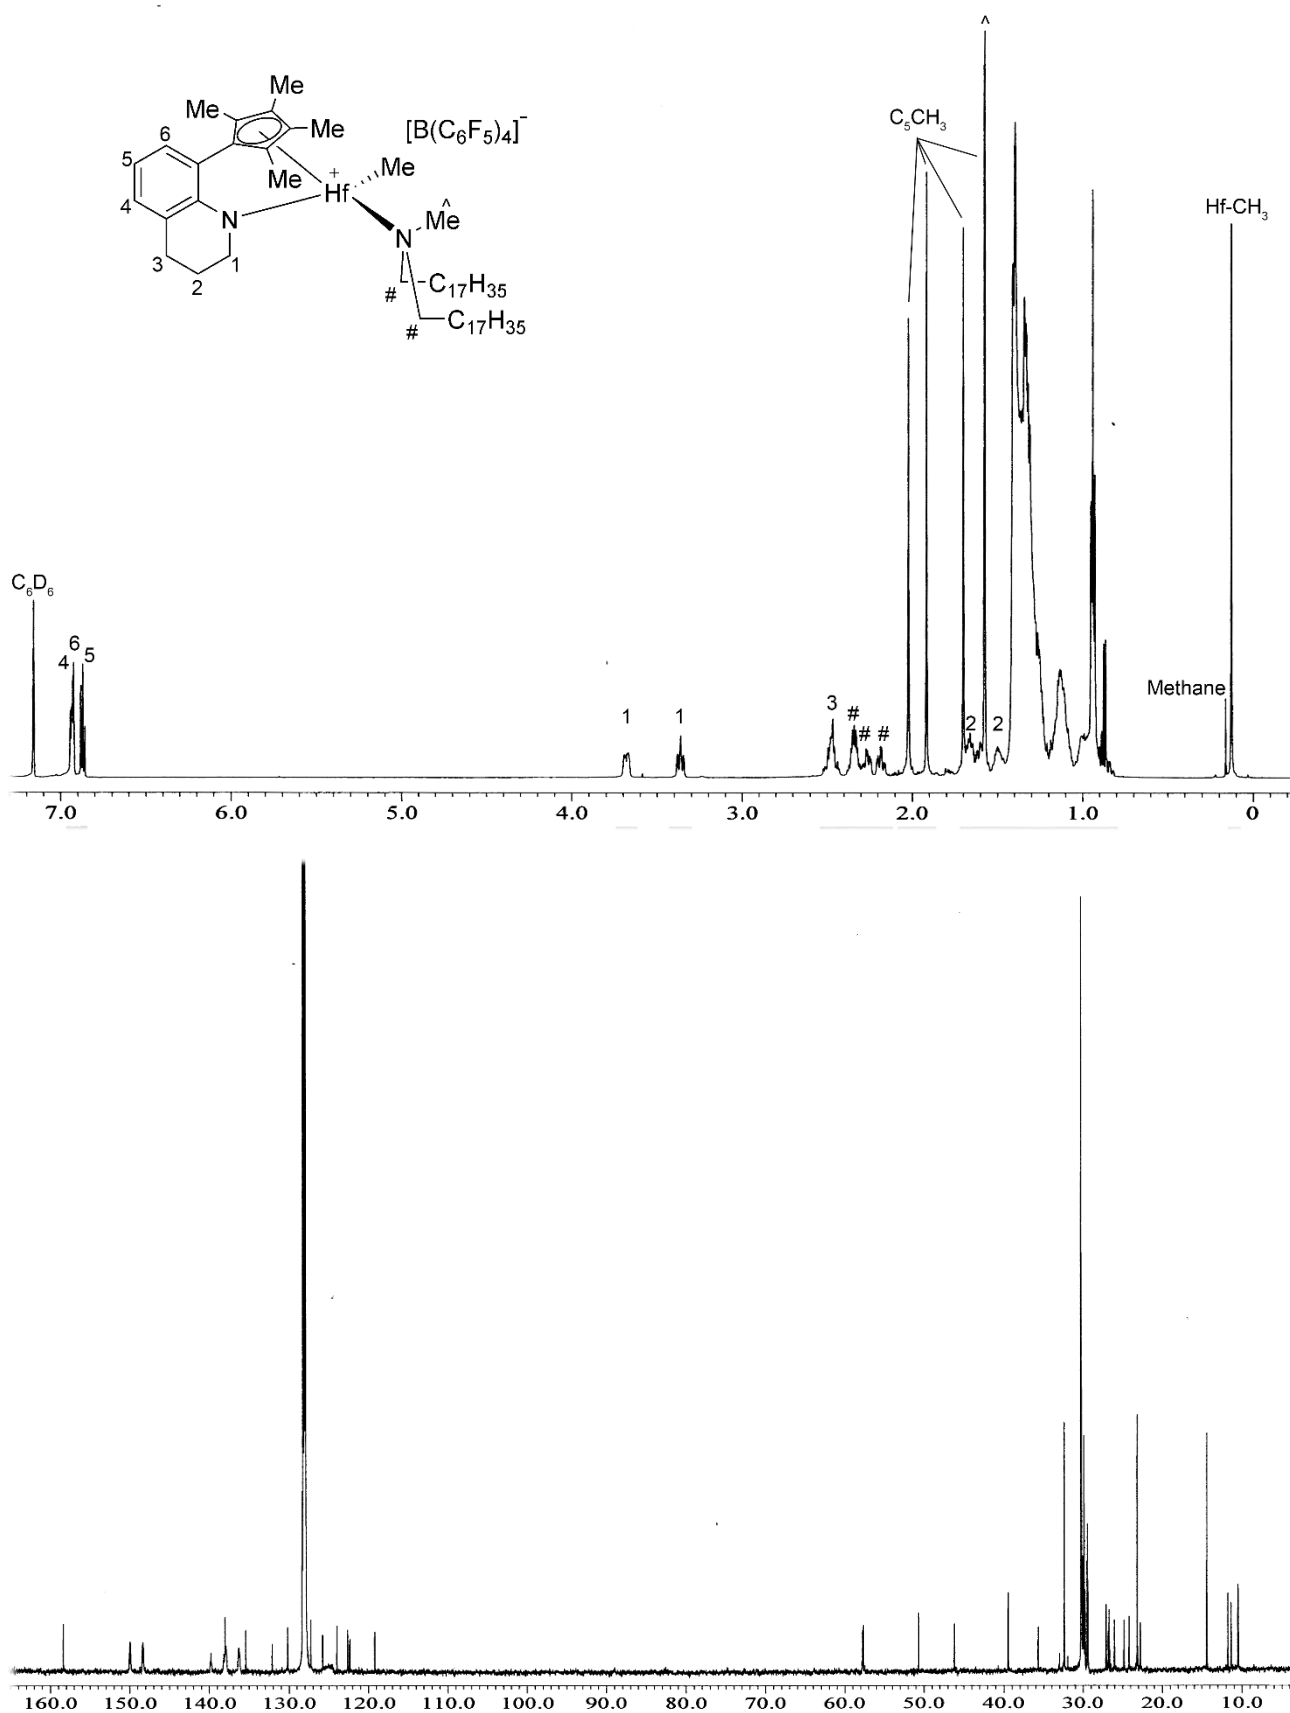



**Figure S16.**  $^1\text{H}$  NMR spectrum recorded on the reaction of **2** with  $[(\text{C}_{18}\text{H}_{37})_2\text{N}(\text{H})\text{Me}]^+[\text{B}(\text{C}_6\text{F}_5)_4]^-$  at 3 h.

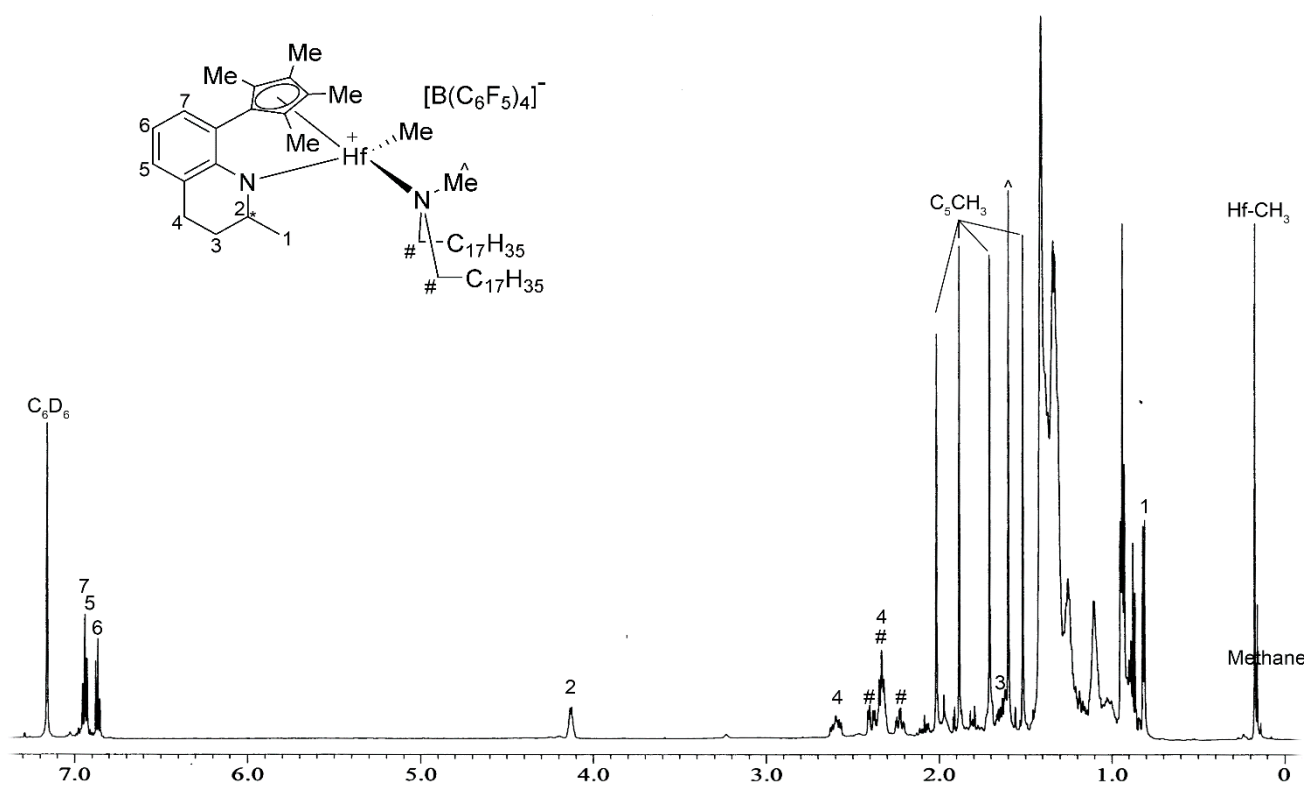

**Figure S17.**  $^1\text{H}$  NMR spectrum recorded on the reaction of **3** with  $[(\text{C}_{18}\text{H}_{37})_2\text{N}(\text{H})\text{Me}]^+[\text{B}(\text{C}_6\text{F}_5)_4]^-$  at 5 h.

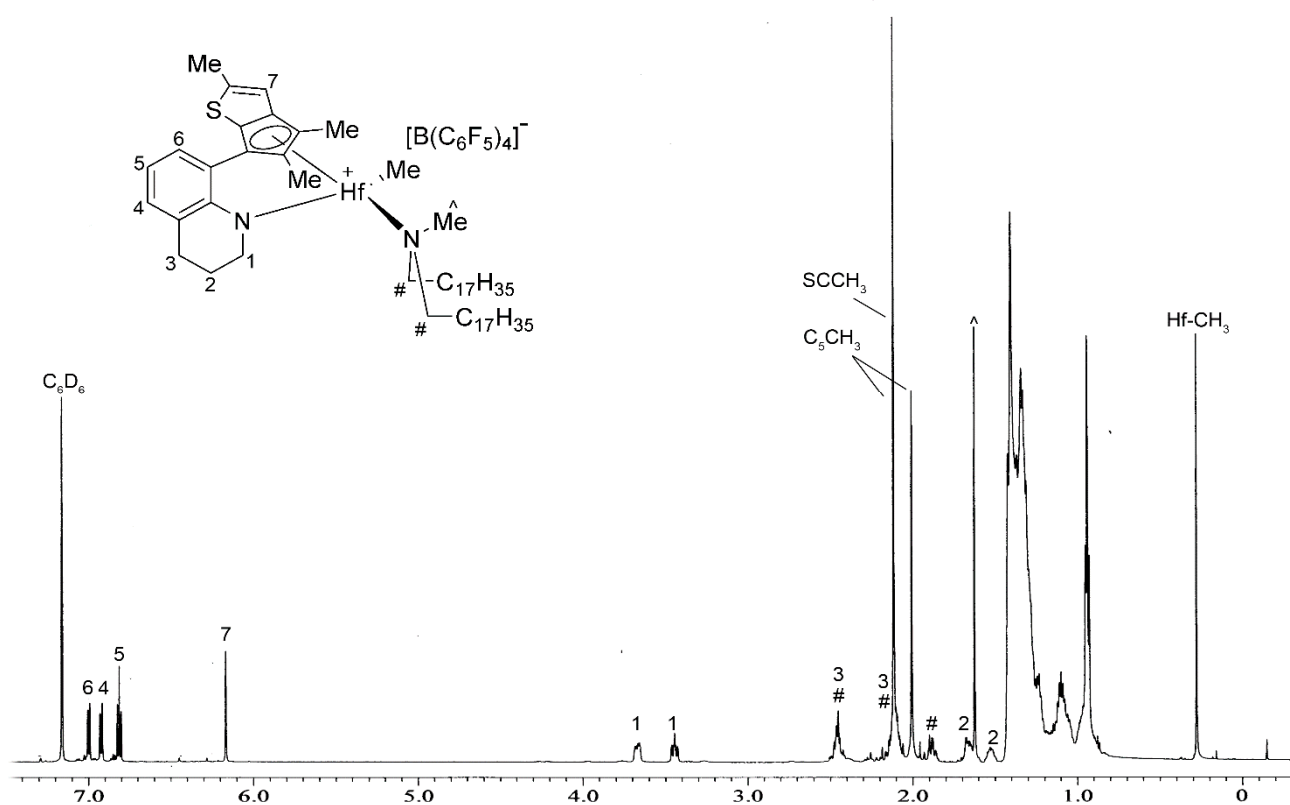

**Figure S18.**  $^1\text{H}$  NMR spectrum recorded on the reaction of **4** with  $[(\text{C}_{18}\text{H}_{37})_2\text{N}(\text{H})\text{Me}]^+[\text{B}(\text{C}_6\text{F}_5)_4]^-$  at 5 h.

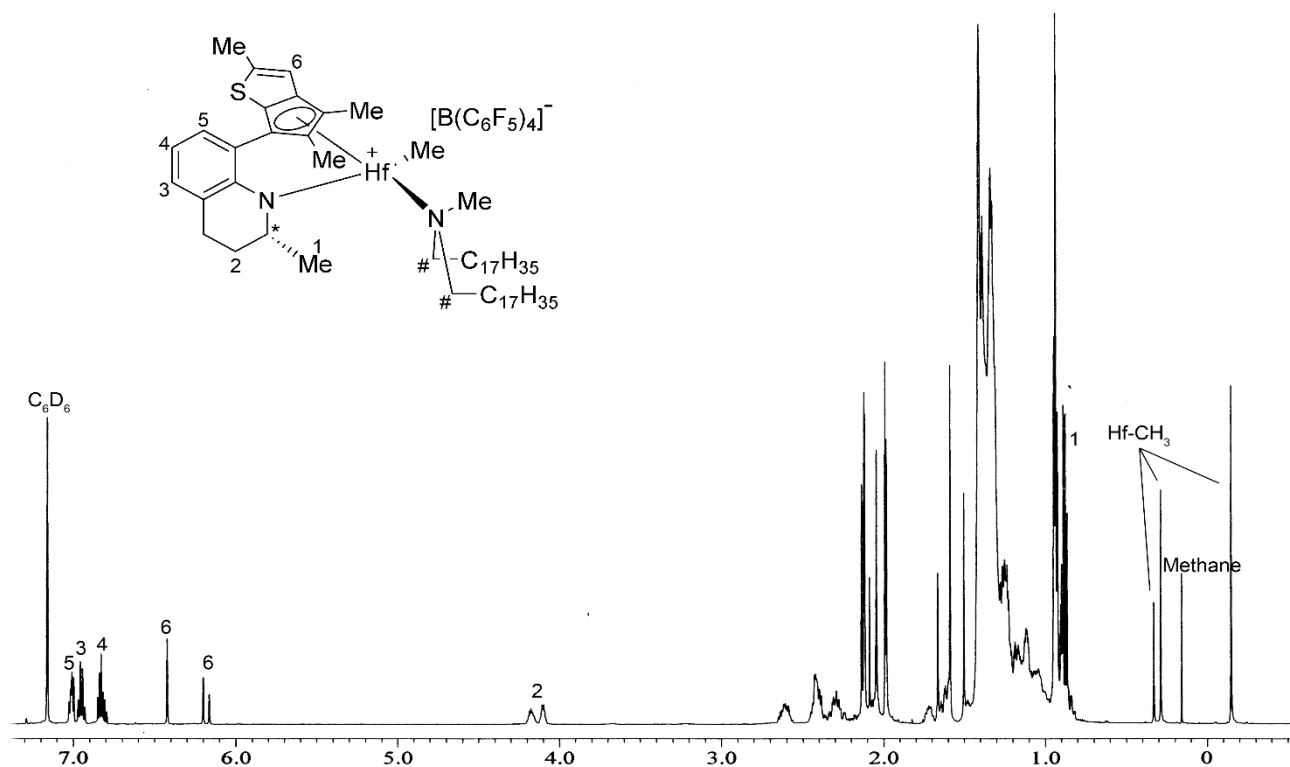

**Figure S19.**  $^1\text{H}$  NMR spectrum recorded on the reaction of **5** with  $[(\text{C}_{18}\text{H}_{37})_2\text{N}(\text{H})\text{Me}]^+[\text{B}(\text{C}_6\text{F}_5)_4]^-$  at 3 h.

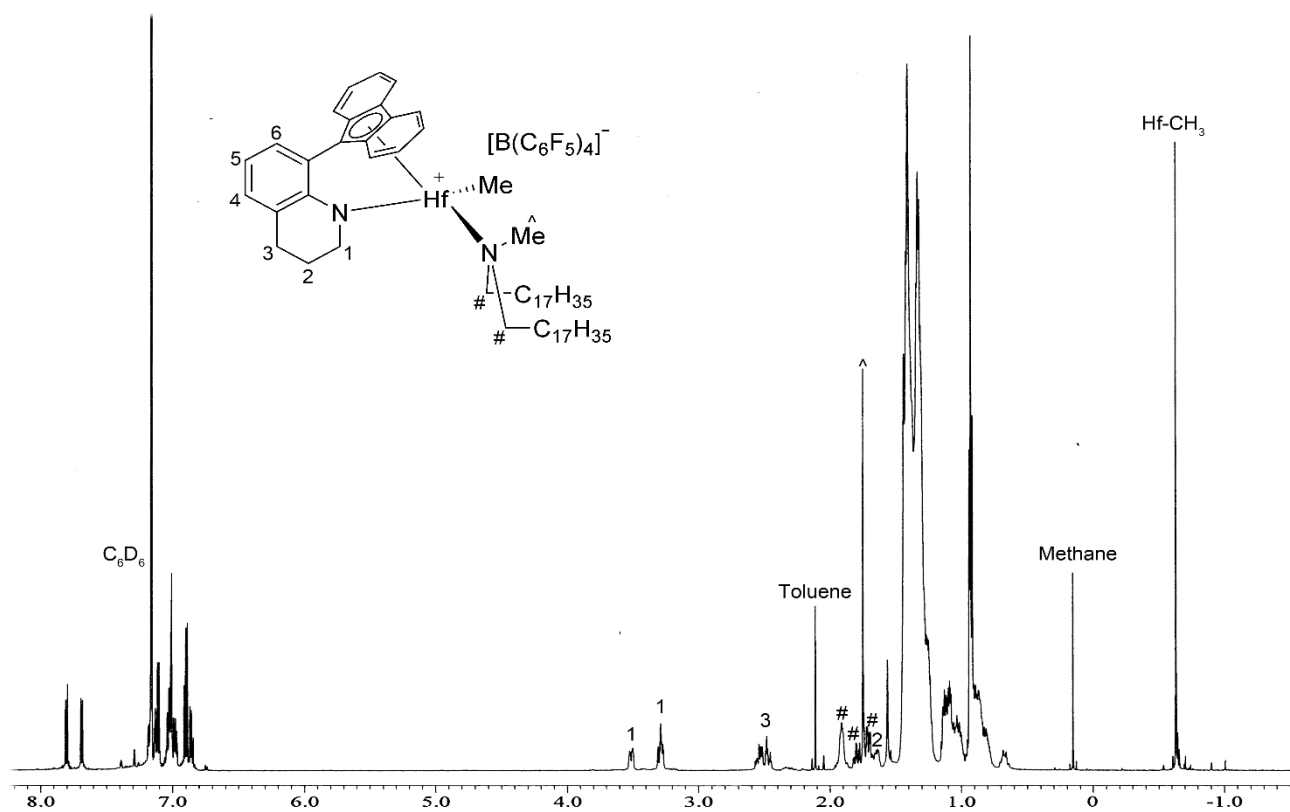

3 h.

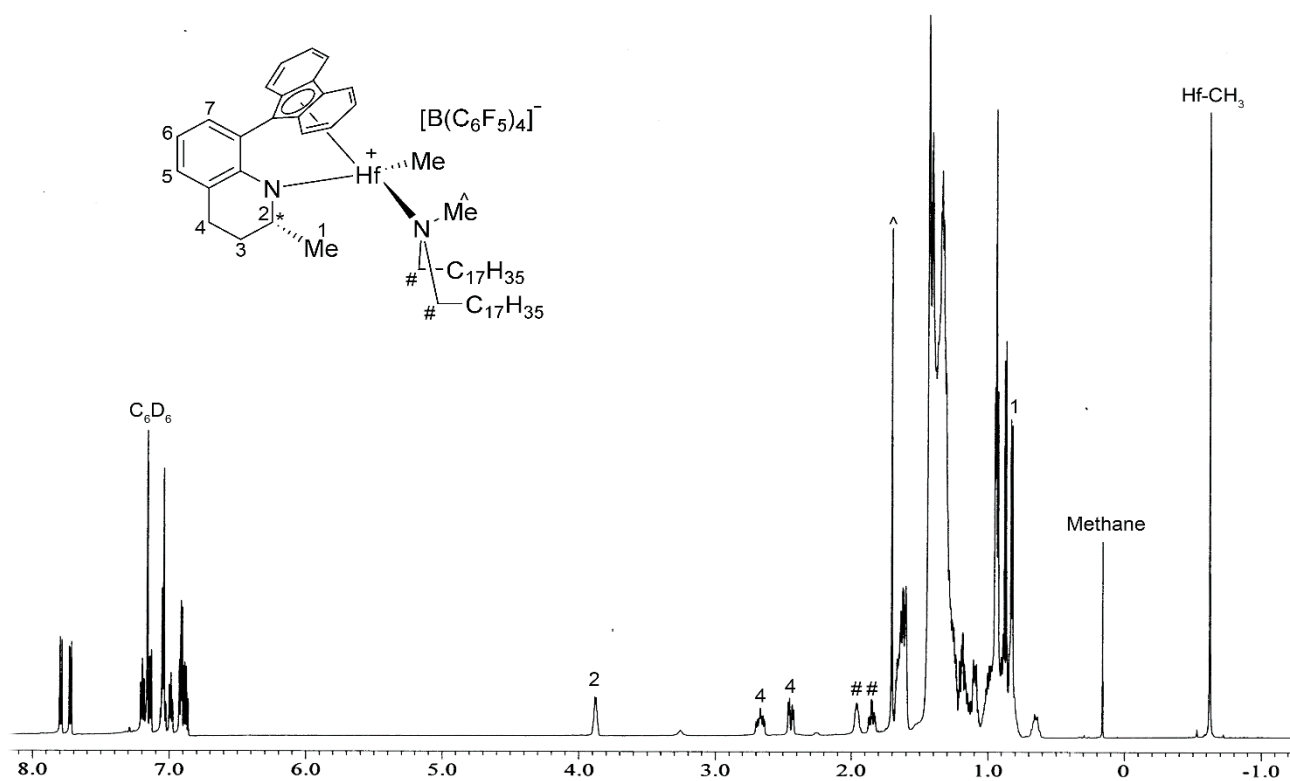

at 0.5 h.

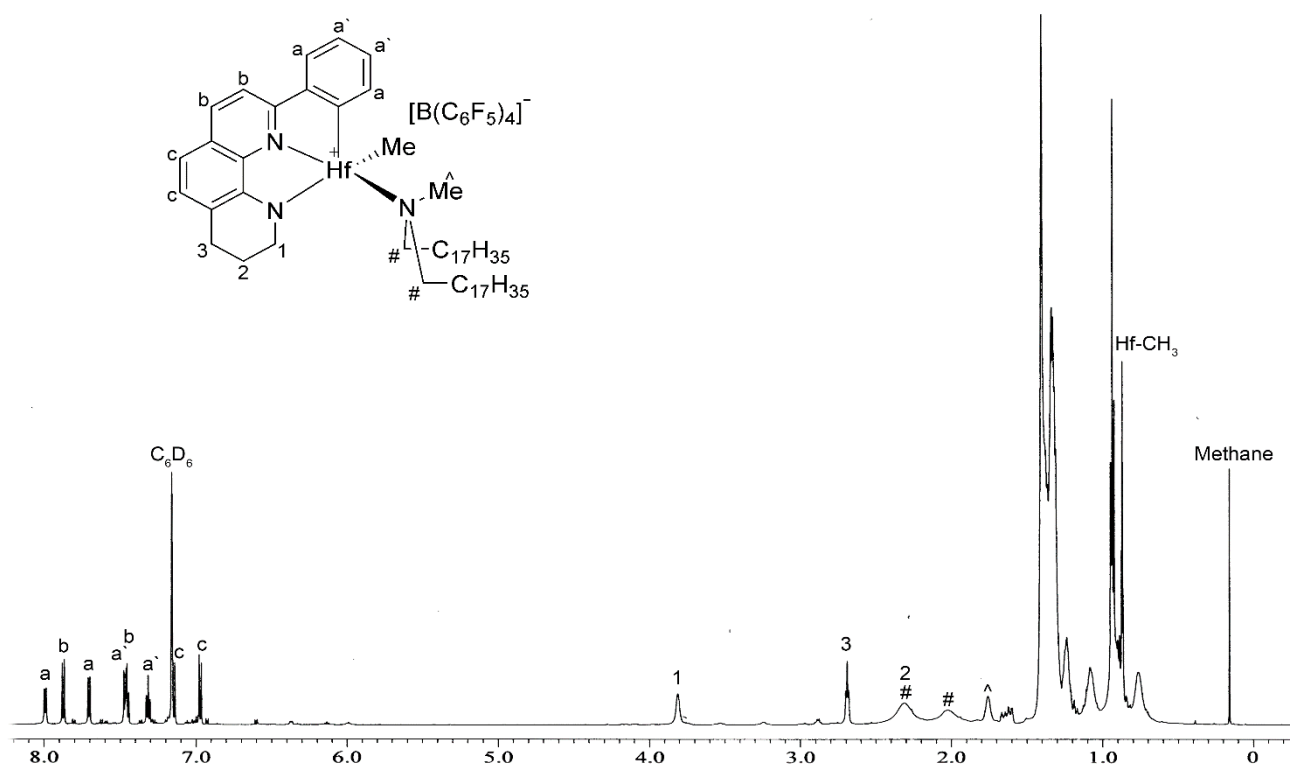

**Figure S22.**  $^1\text{H}$  NMR spectrum recorded on the reaction of **11** with  $[(\text{C}_{18}\text{H}_{37})_2\text{N}(\text{H})\text{Me}]^+[\text{B}(\text{C}_6\text{F}_5)_4]^-$  at 0.5 h.

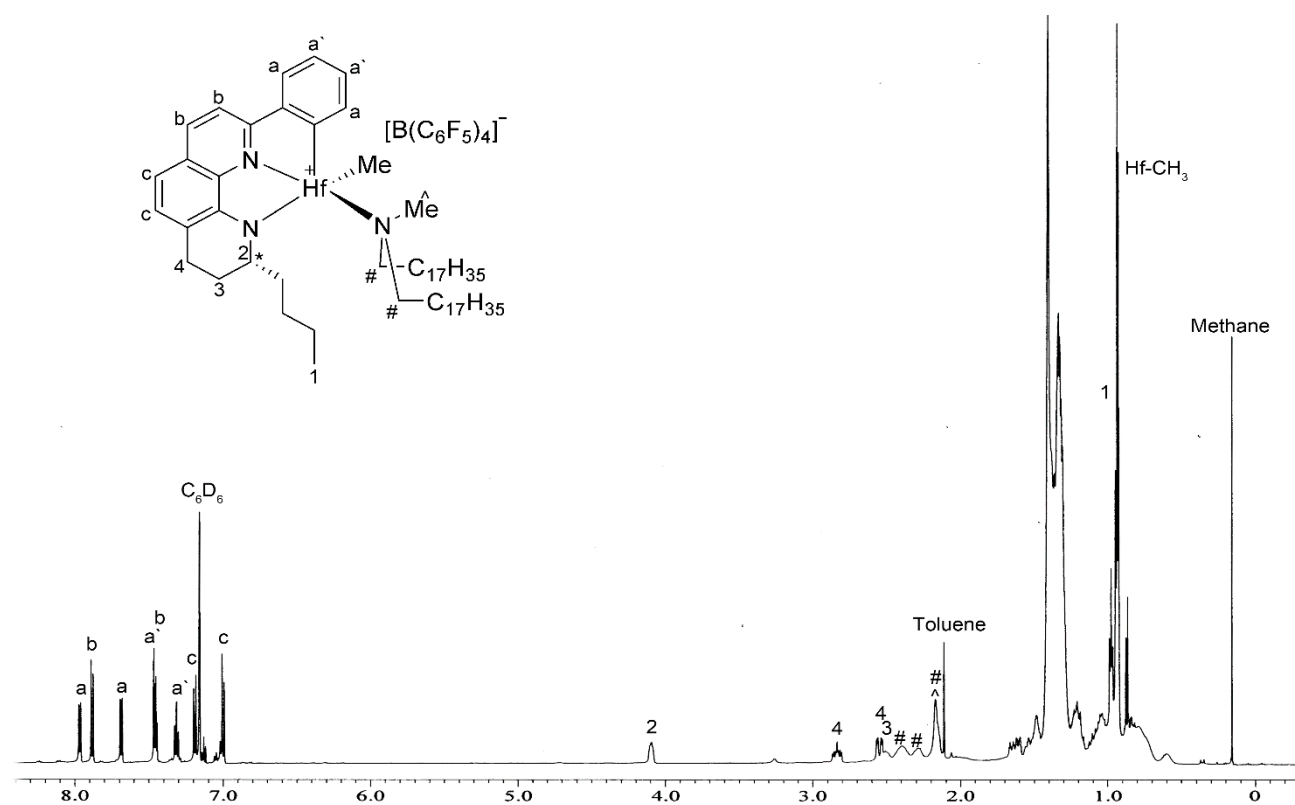

**Figure S23.**  $^1\text{H}$  and  $^{13}\text{C}$  NMR spectra recorded on the reaction of **12** with  $[(\text{C}_{18}\text{H}_{37})_2\text{N}(\text{H})\text{Me}]^+[\text{B}(\text{C}_6\text{F}_5)_4]^-$  at 0.5 h.

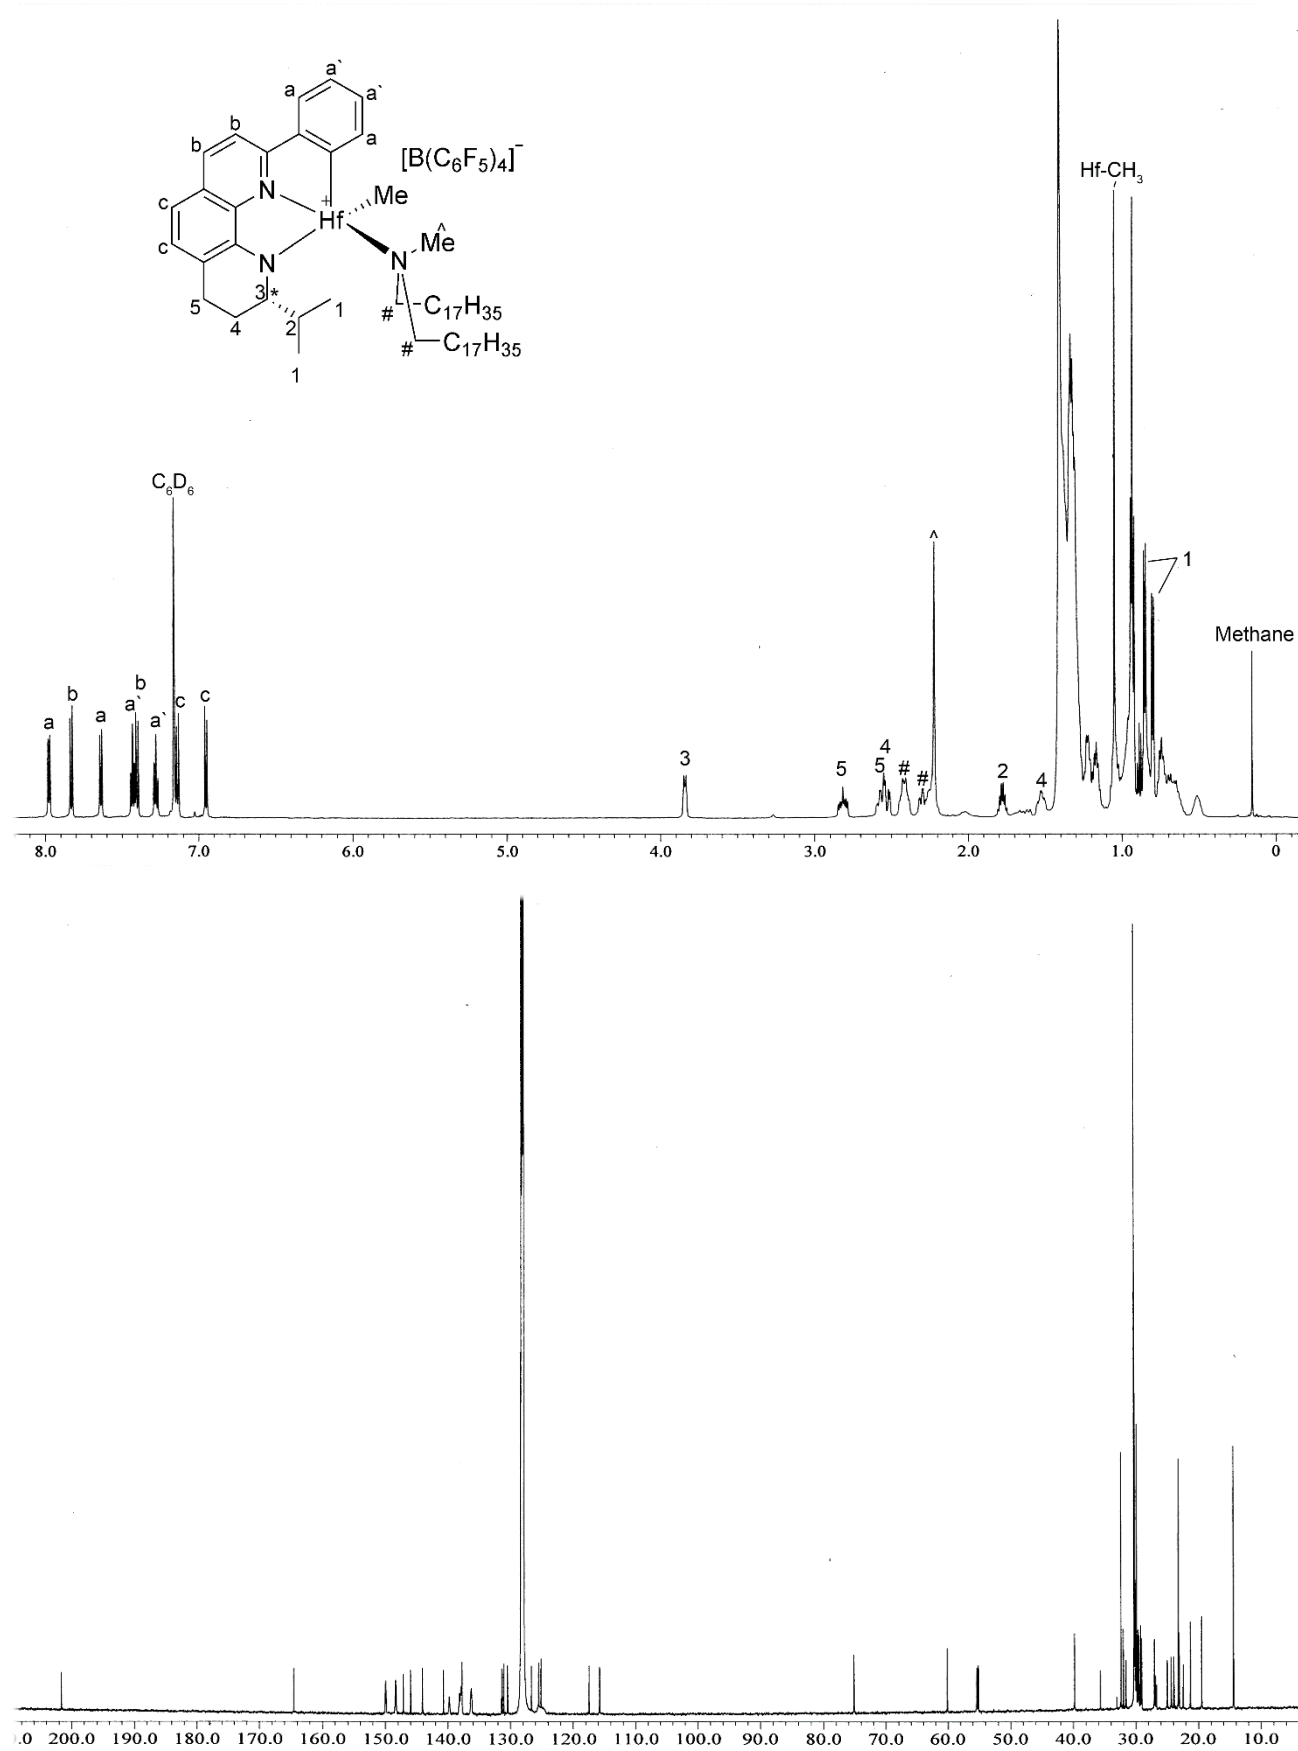

**Figure S24.**  $^1\text{H}$  NMR spectrum recorded on the reaction of **15** with  $[(\text{C}_{18}\text{H}_{37})_2\text{N}(\text{H})\text{Me}]^+[\text{B}(\text{C}_6\text{F}_5)_4]^-$  at 1 h..

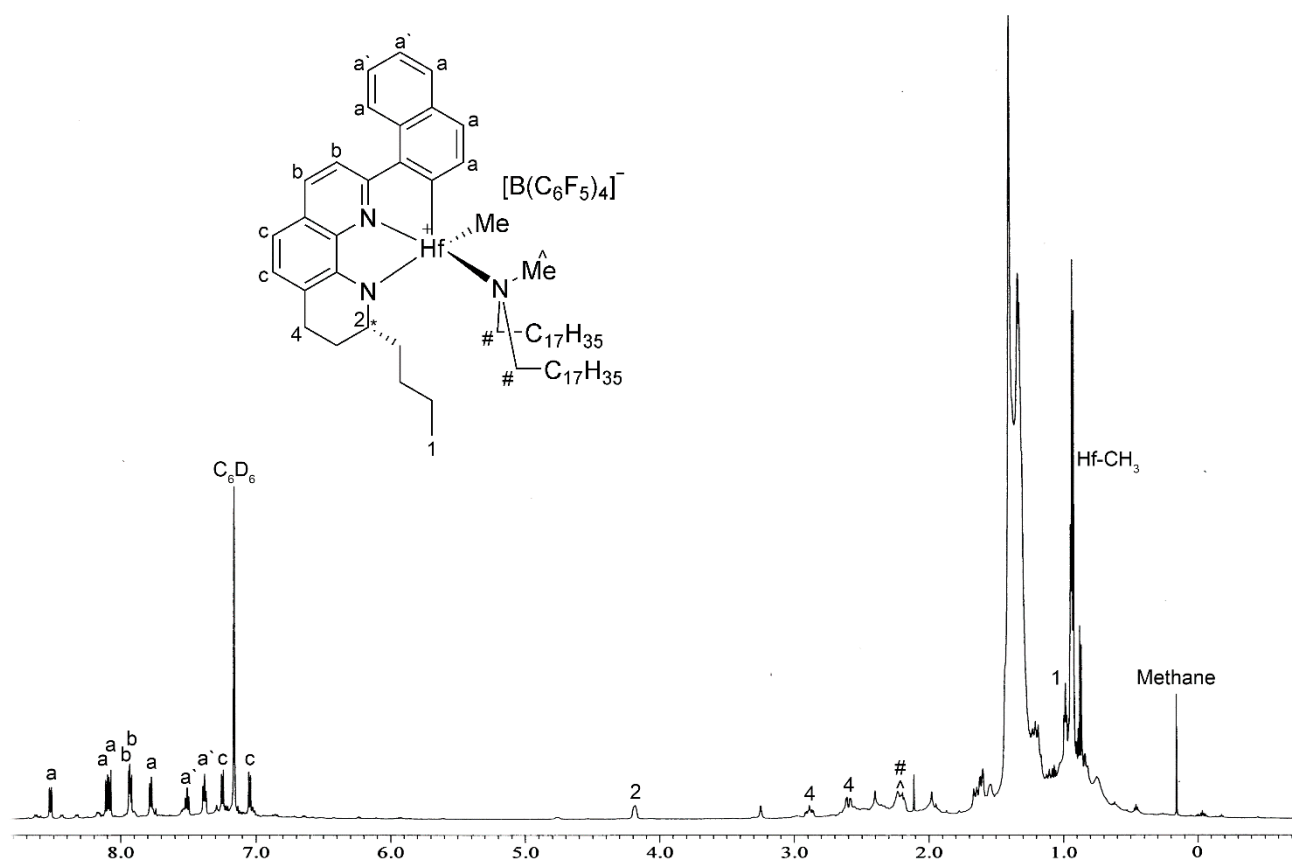

**Figure S25.**  $^1\text{H}$  NMR spectrum recorded on the reaction of **16** with  $[(\text{C}_{18}\text{H}_{37})_2\text{N}(\text{H})\text{Me}]^+[\text{B}(\text{C}_6\text{F}_5)_4]^-$  at 1 h.

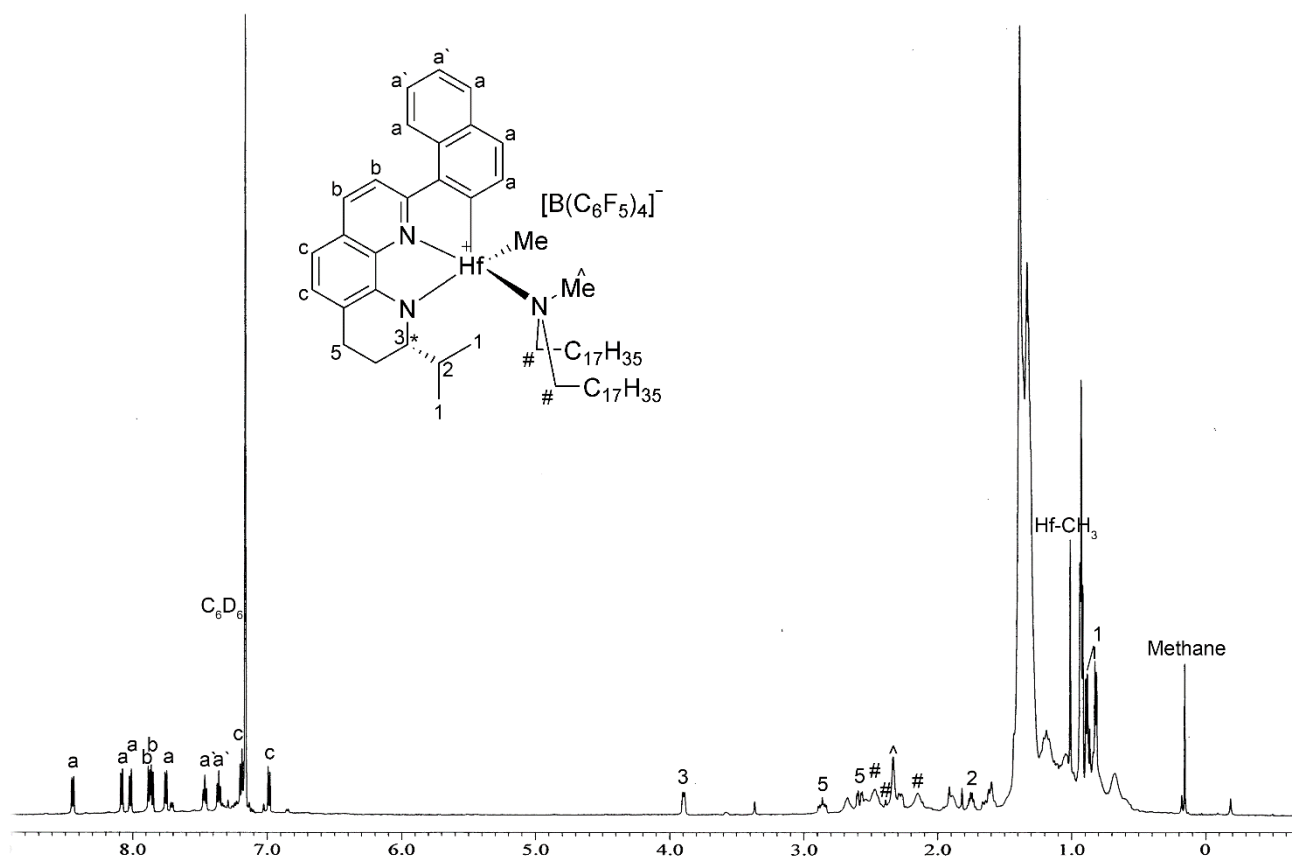

**Figure S26.**  $^1\text{H}$  NMR spectrum recorded on the reaction of **16** with  $[(\text{C}_{18}\text{H}_{37})_2\text{N}(\text{H})\text{Me}]^+[\text{B}(\text{C}_6\text{F}_5)_4]^-$  containing water at 1 h.

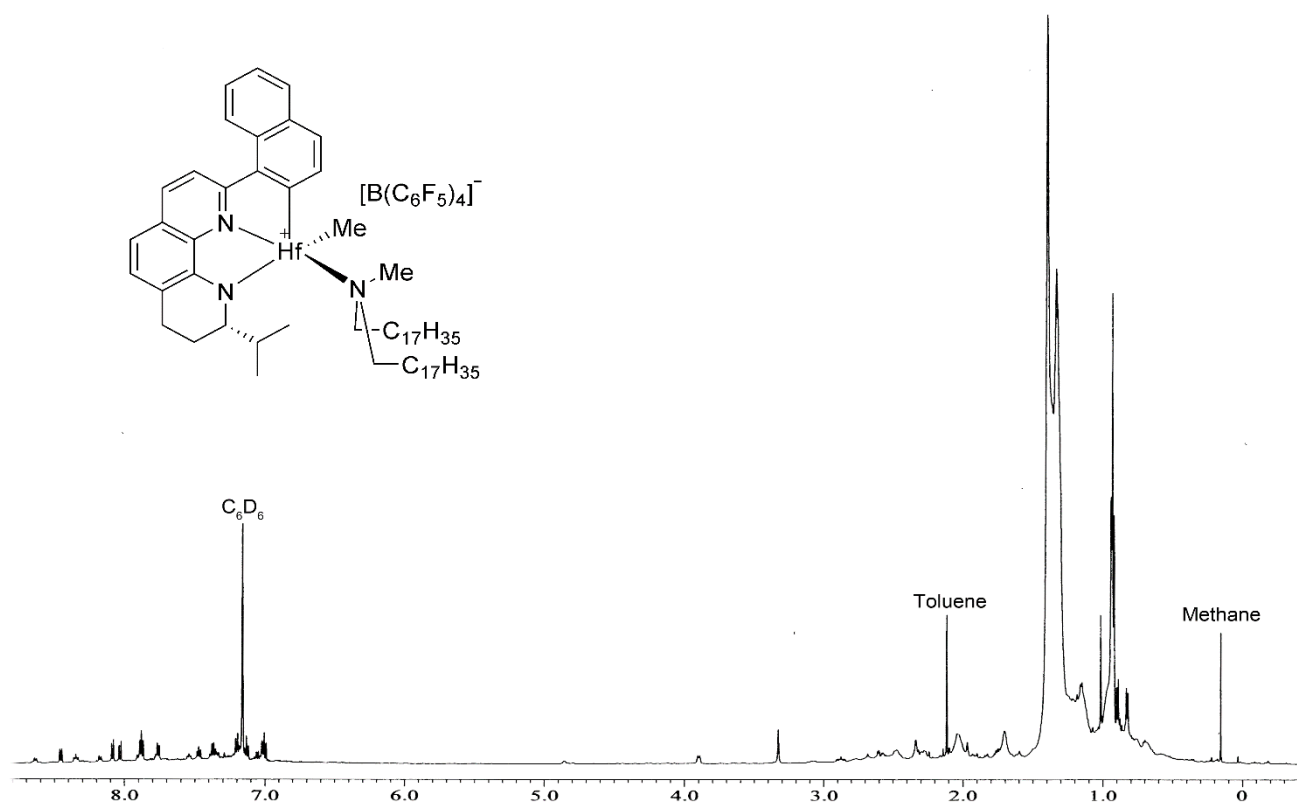

**Figure S27.**  $^1\text{H}$  NMR spectrum of anhydrous  $[(\text{C}_{18}\text{H}_{37})_2\text{N}(\text{H})\text{Me}]^+[\text{B}(\text{C}_6\text{F}_5)_4]^-$  prepared in this work.

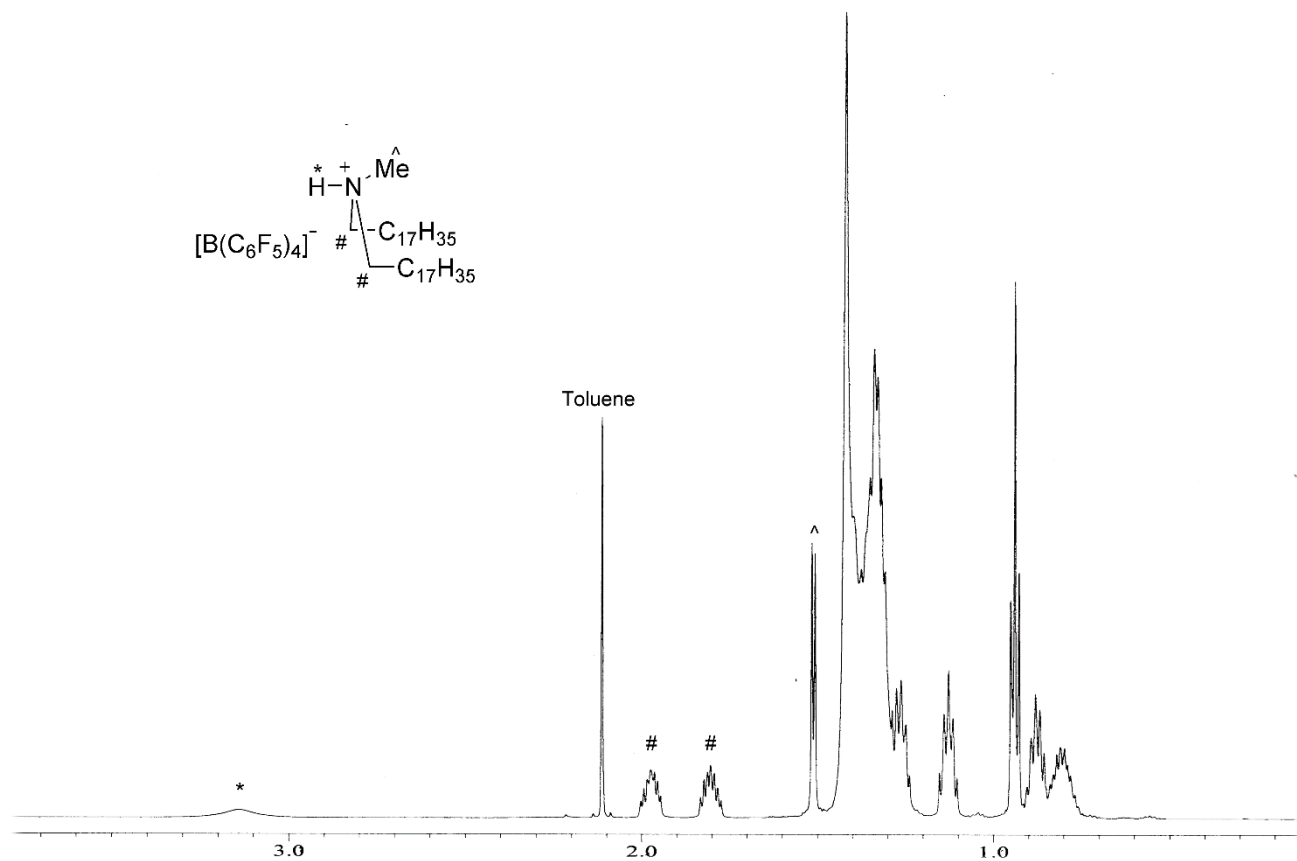

**Figure S28.**  $^1\text{H}$  NMR spectrum of  $[(\text{C}_{18}\text{H}_{37})_2\text{N}(\text{H})\text{Me}]^+[\text{B}(\text{C}_6\text{F}_5)_4]^-$  containing water prepared by the method reported in patent.

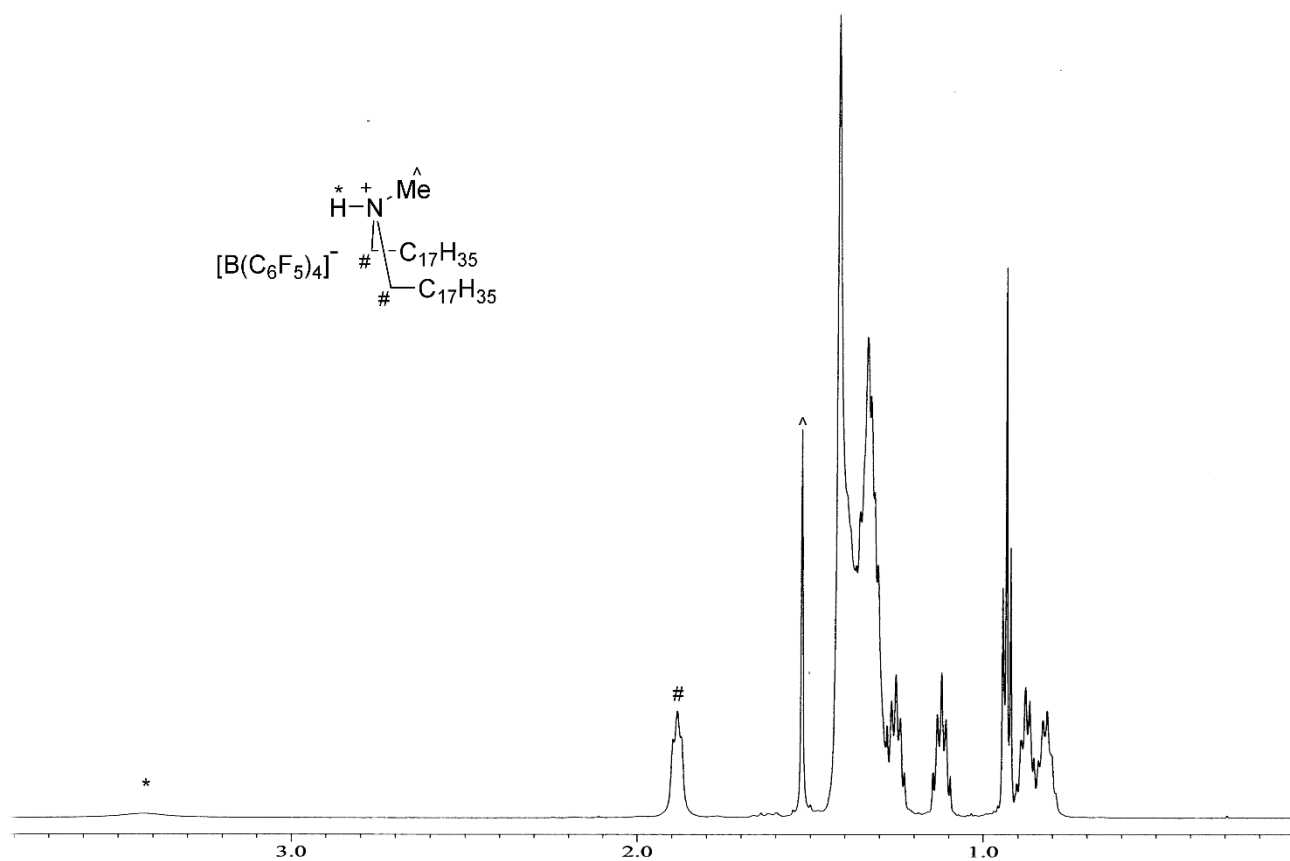

**Figure S29.**  $^1\text{H}$  NMR spectrum of polymer (entry 3 in Table 1).

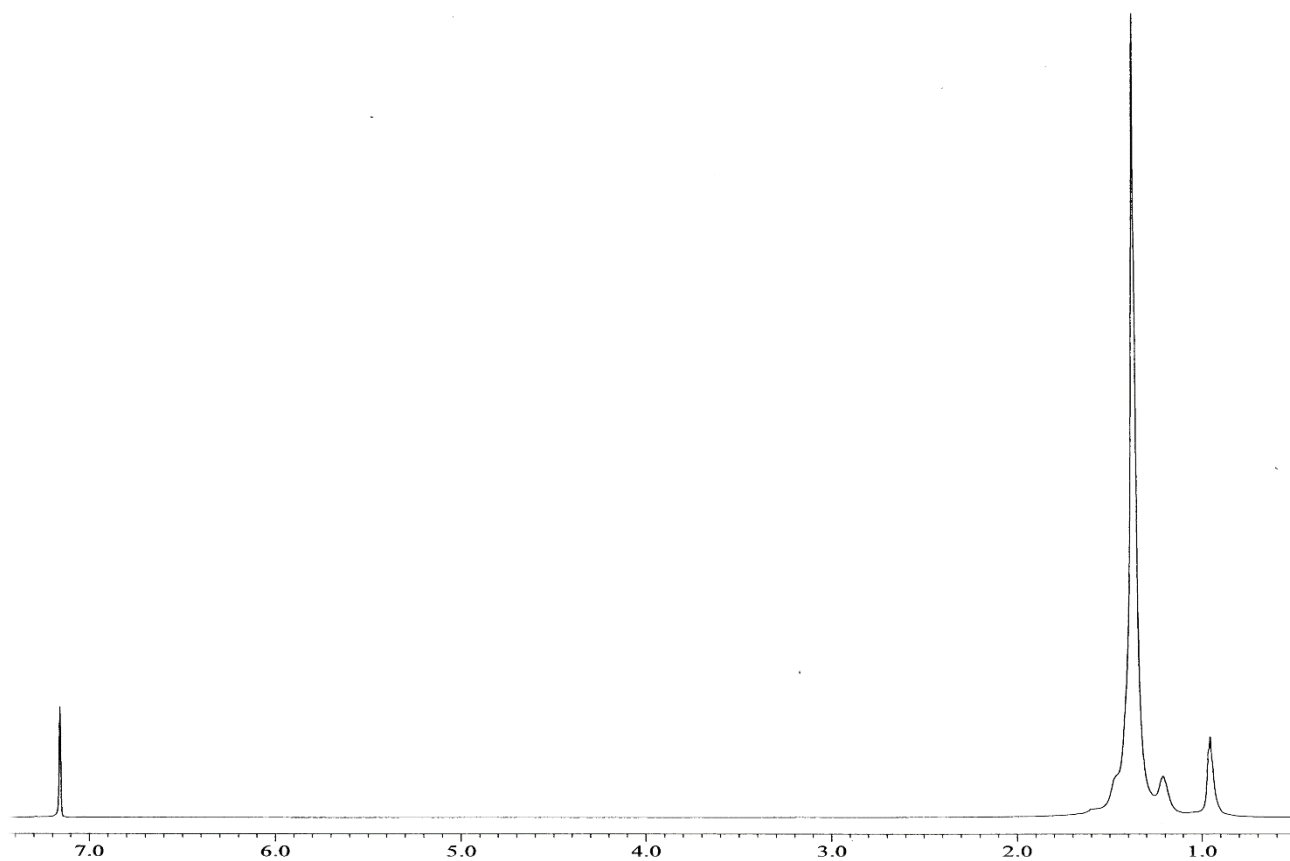



**Figure S30.**  $^1\text{H}$  NMR spectrum of Polymer (entry 5 in Table 1).

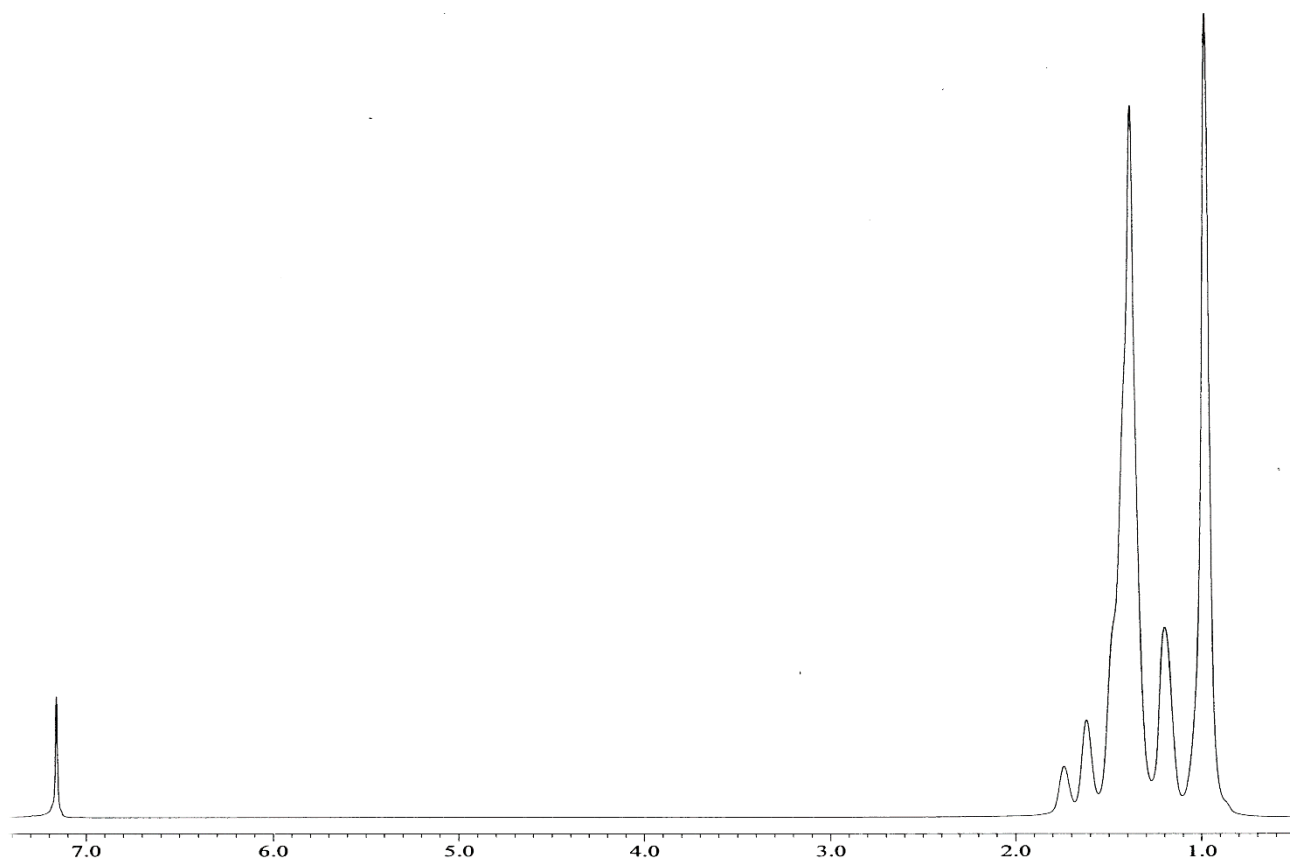

**Figure S31.** DSC Thermograms

<Entry 1 in Table 1>

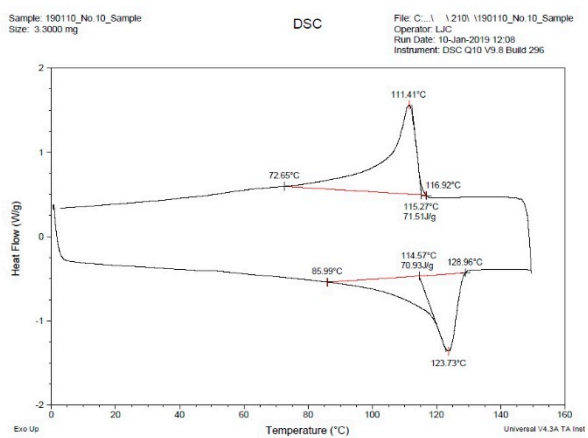

<Entry 2 in Table 1>

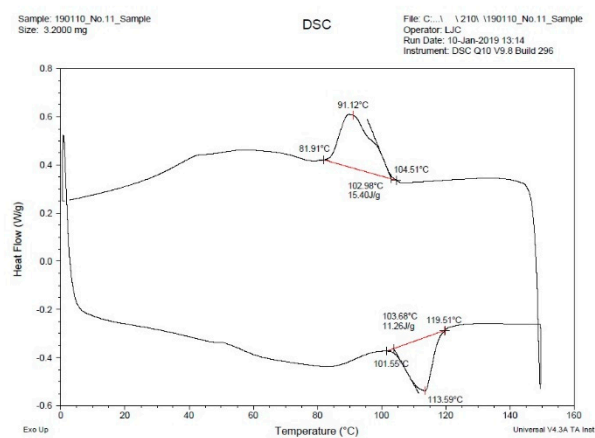

<Entry 3 in Table 1>

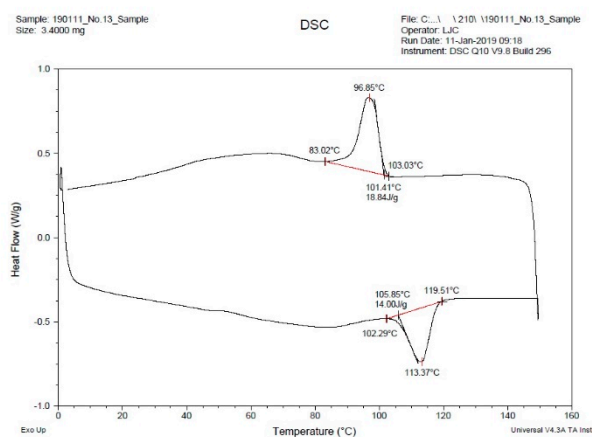

<Entry 4 in Table 1>

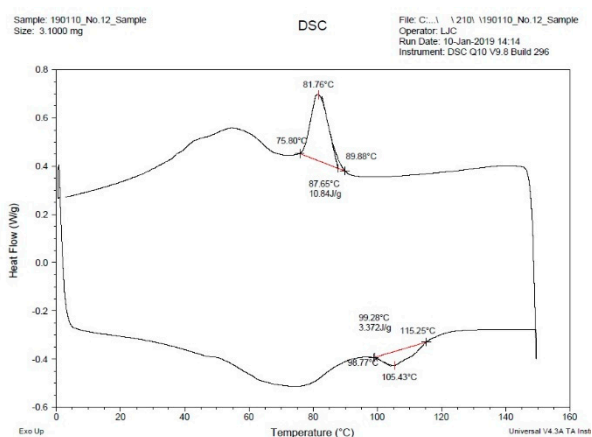

<Entry 5 in Table 1>

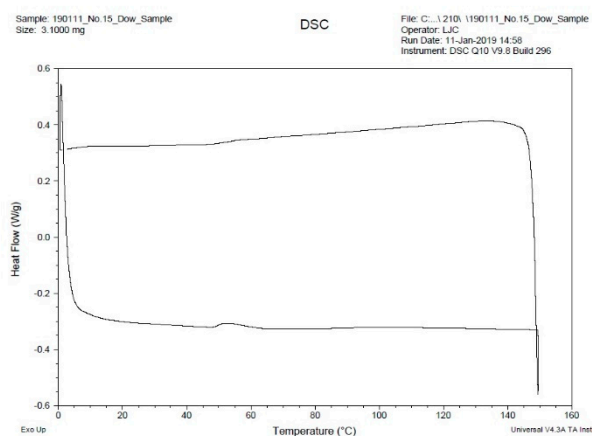

<Entry 6 in Table 1>

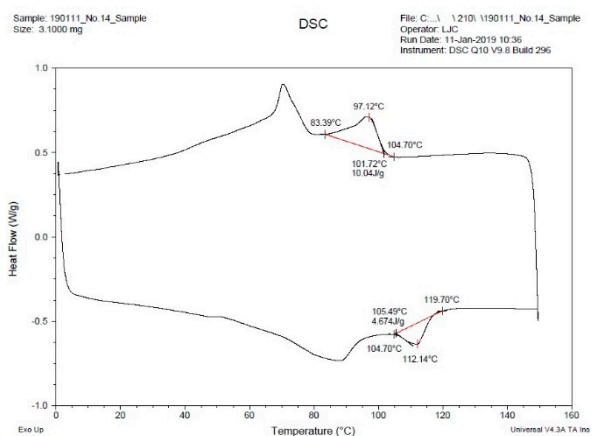

<Entry 7 in Table 1>

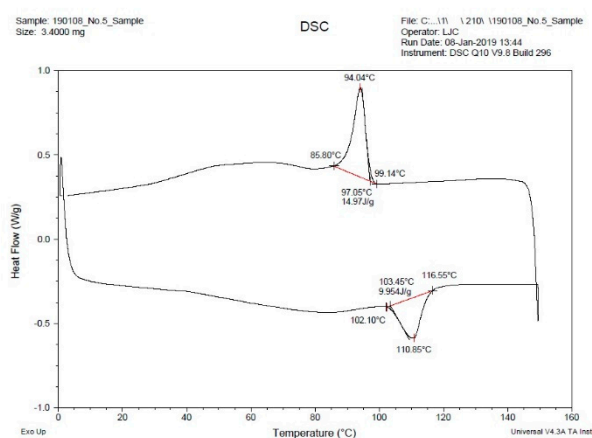

<Entry 8 in Table 1>

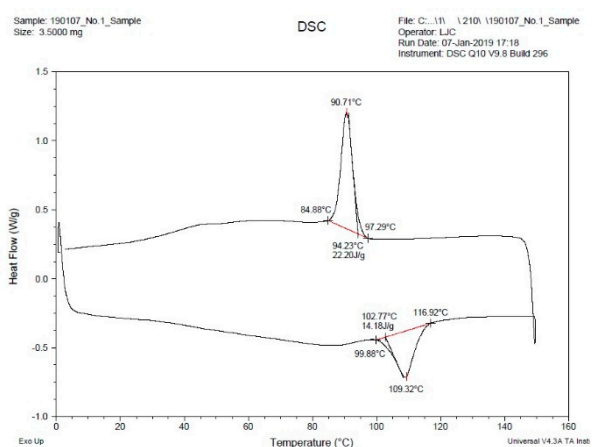

<Entry 9 in Table 1>

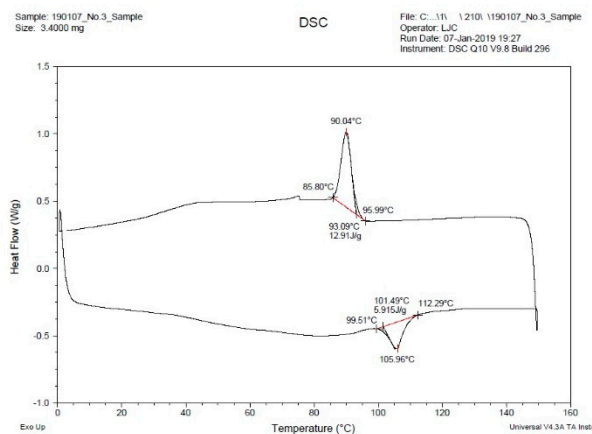

<Entry 10 in Table 1>

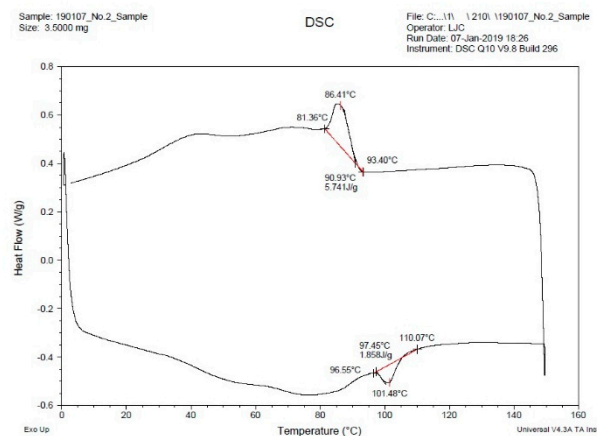

<Entry 11 in Table 1>

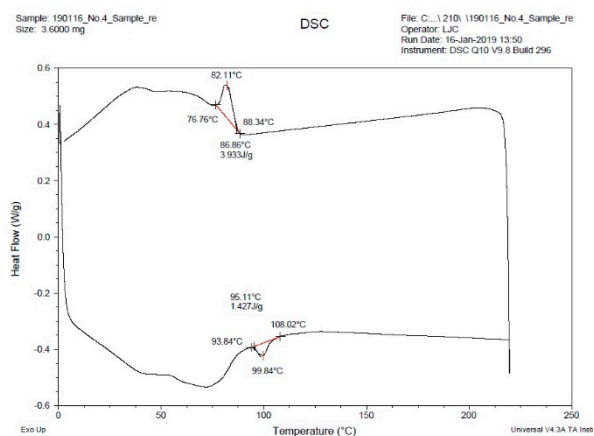

Supplement: s1 [file s1]
